# Supplementary material
Source: MDPI journal article supplement (https://www.mdpi.com/1424-8247/16/1/54)
Supplement: s1 [file s1]

## Supplementary Materials

### Exploring mannosylpurines as copper chelators and cholinesterase inhibitors with potential to Alzheimer's disease

**Ignazio Schino**<sup>1,2,3</sup>, **Mariangela Cantore**<sup>1,2,3</sup>, **Modesto de Candia**<sup>3</sup>, **Cosimo D. Altomare**<sup>3</sup>, **Catarina Maria**<sup>1,4</sup>, **João Barros**<sup>1</sup>, **Vasco Cachatra**<sup>1</sup>, **Patrícia Calado**<sup>1</sup>, **Karina Shimizu**<sup>5</sup>, **Adilson A. Freitas**<sup>5</sup>, **Maria C. Oliveira**<sup>5</sup>, **Maria J. Ferreira**<sup>5</sup>, **José N. C. Lopes**<sup>5</sup>, **Nicola A. Colabufo**<sup>3\*</sup> and **Amélia P. Rauter**<sup>1,\*</sup>

<sup>1</sup> Centro de Química Estrutural, Institute of Molecular Sciences, Faculdade de Ciências, Universidade de Lisboa, Ed C8, Piso 5, Campo Grande, 1749-016 Lisboa, Portugal

<sup>2</sup> Biofordrug srl, Via Dante 95, 70019 Triggiano, Italy

<sup>3</sup> Department of Pharmacy-Pharmaceutical Sciences, University of Bari Aldo Moro, Via E. Orabona 4, 70125 Bari, Italy

<sup>4</sup> Departamento de Química, Faculdade de Ciências e Tecnologia, Universidade Nova de Lisboa, Largo da Torre, 2825-149 Caparica, Portugal

<sup>5</sup> Centro de Química Estrutural, Institute of Molecular Sciences Instituto Superior Técnico, Universidade de Lisboa, Av. Rovisco Pais, 1049-001 Lisboa, Portugal

\* Correspondence: aprauter@fc.ul.pt (A.P.R.); nicolaantonio.colabufo@uniba.it (N.A.C.); Tel.: +351-964-408-824 (A.P.R.)

**Commented [M11]:** Please carefully check the accuracy of names and affiliations.

**Commented [M12]:** These author names are different from the Susy, please confirm.

**Commented [M13]:** If the information provided presents more than one address, please separate the addresses into different affiliations.

**$^1\text{H}$  NMR and  $^{13}\text{C}$  NMR spectra of the new compounds 5-8, 9,10, 12, 13, 15 and 16**Compound **5** (in  $\text{CD}_3\text{OD}$ )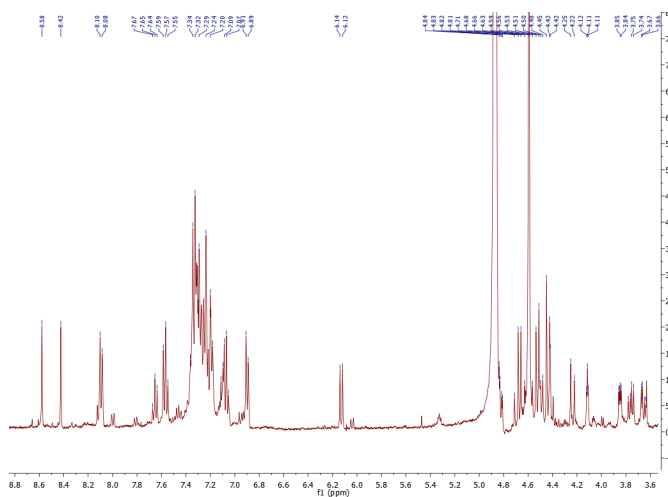Figure S1.  $^1\text{H}$  NMR spectrum for compound **5**.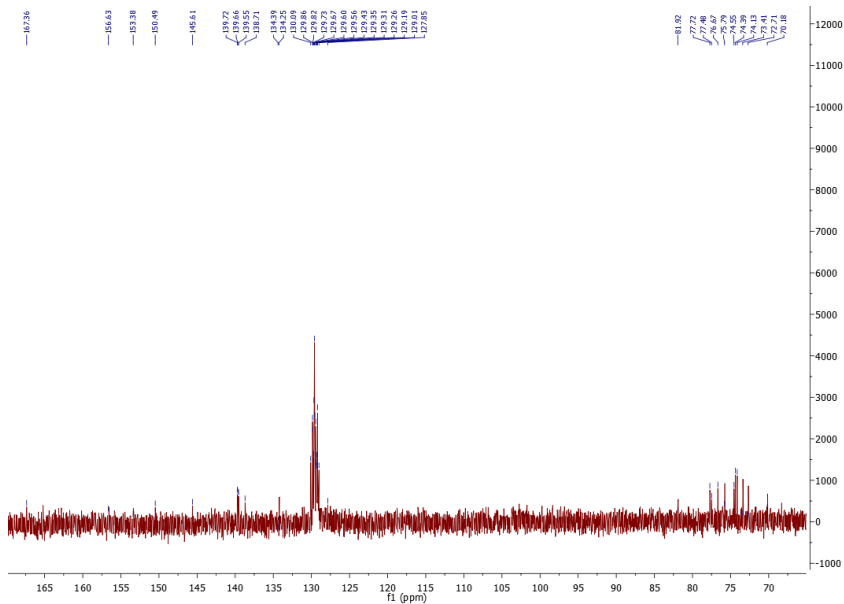

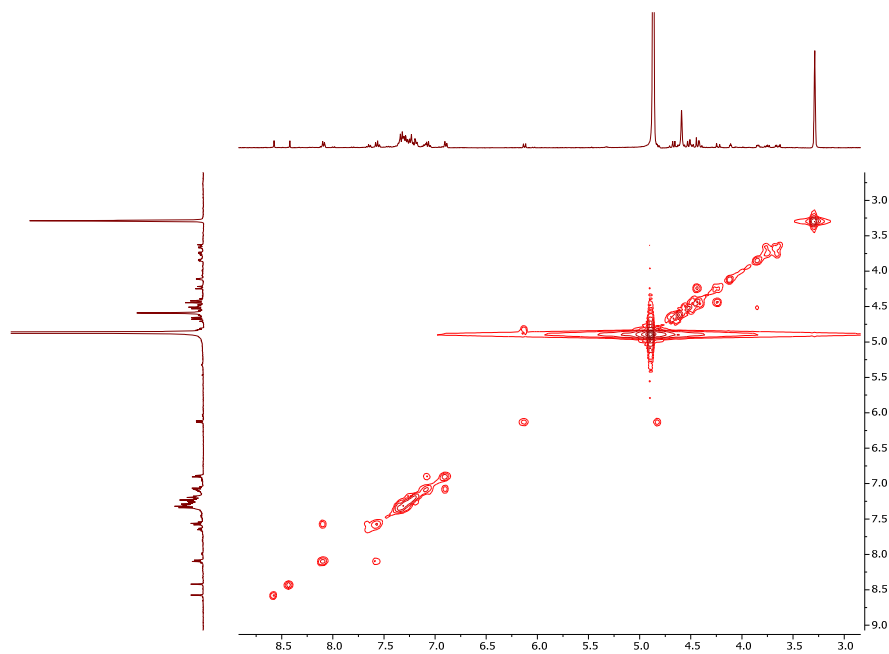

Figure S3. COSY spectrum for compound 5.

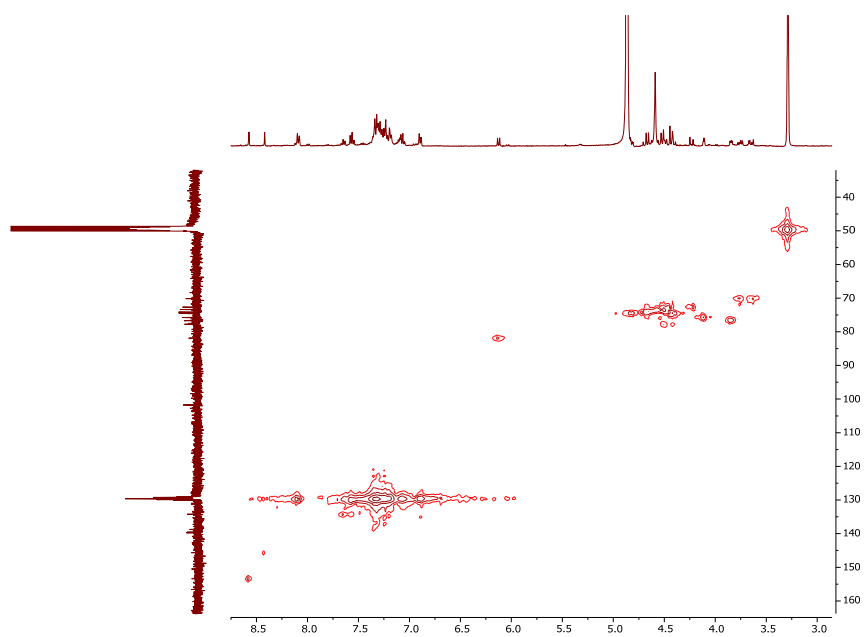

Figure S4. HSQC spectrum for compound 5.

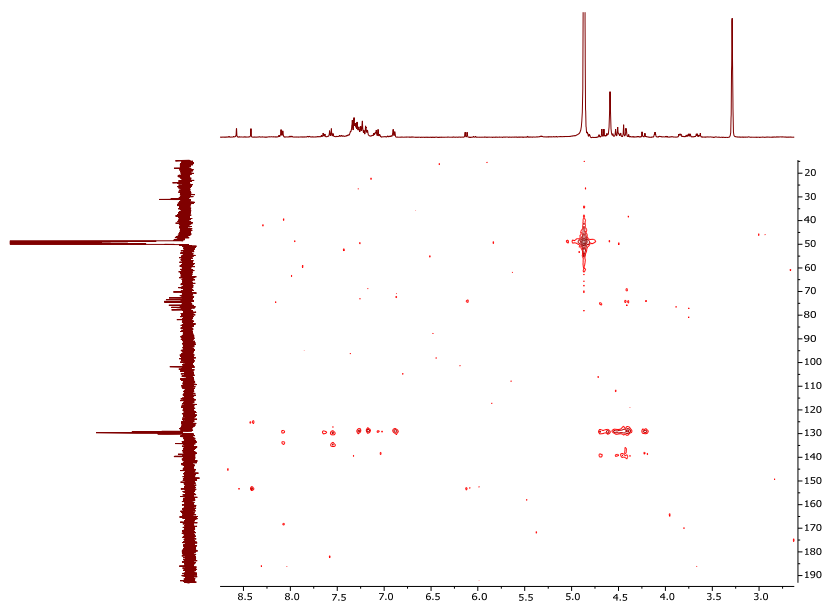

Figure S5. HMBC spectrum for compound 5.

Compound 6 (in  $\text{CDCl}_3$ )

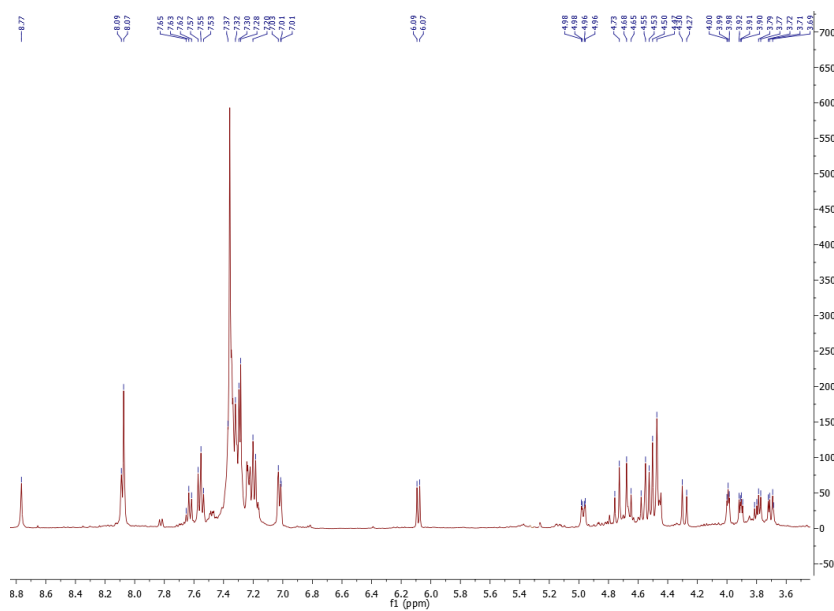

Figure S6.  $^1\text{H}$  NMR spectrum for compound 6.



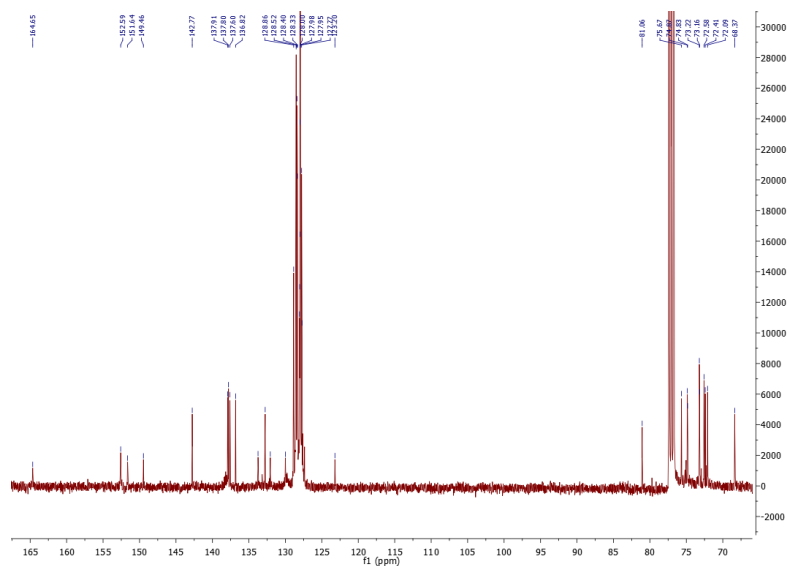

Figure S7.  $^{13}\text{C}$  NMR spectrum for compound 6.

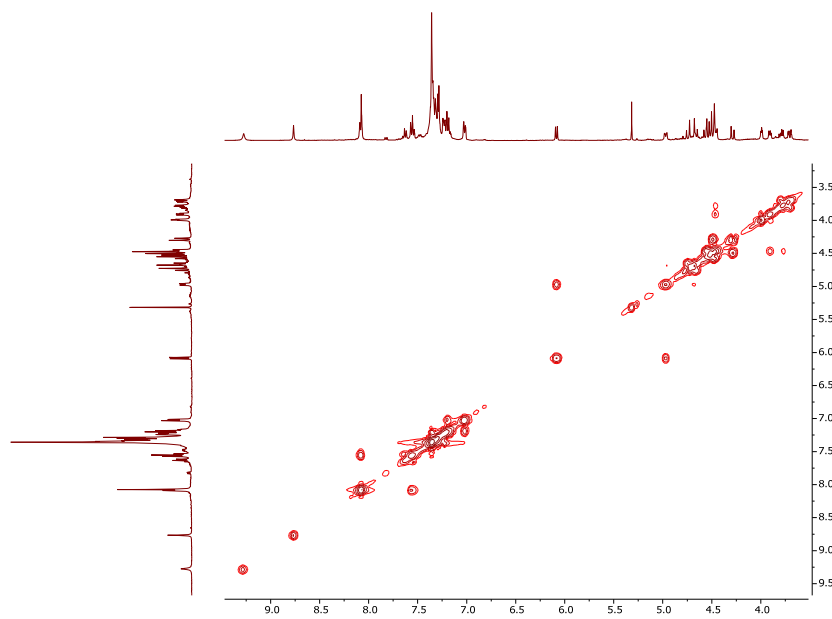

Figure S8. COSY spectrum for compound 6.

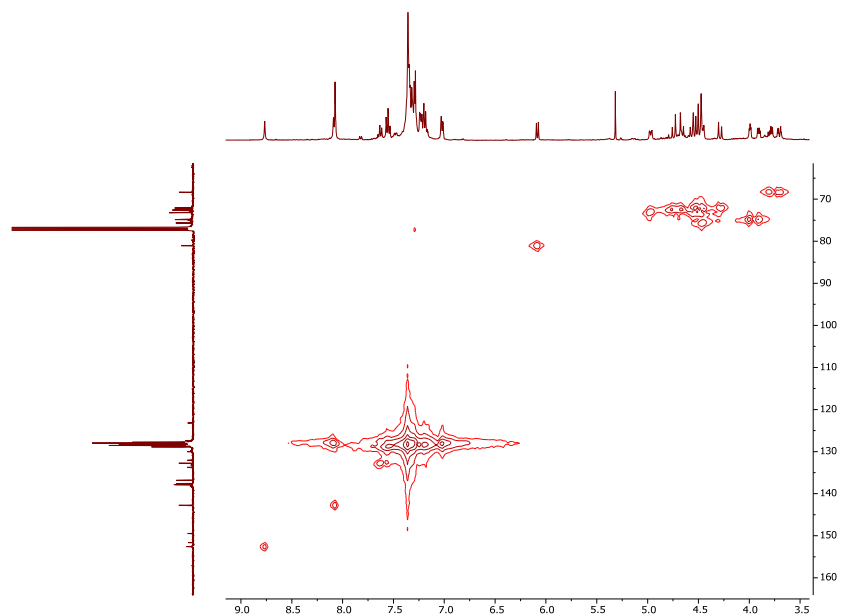

Figure S9. HSQC spectrum for compound 6.

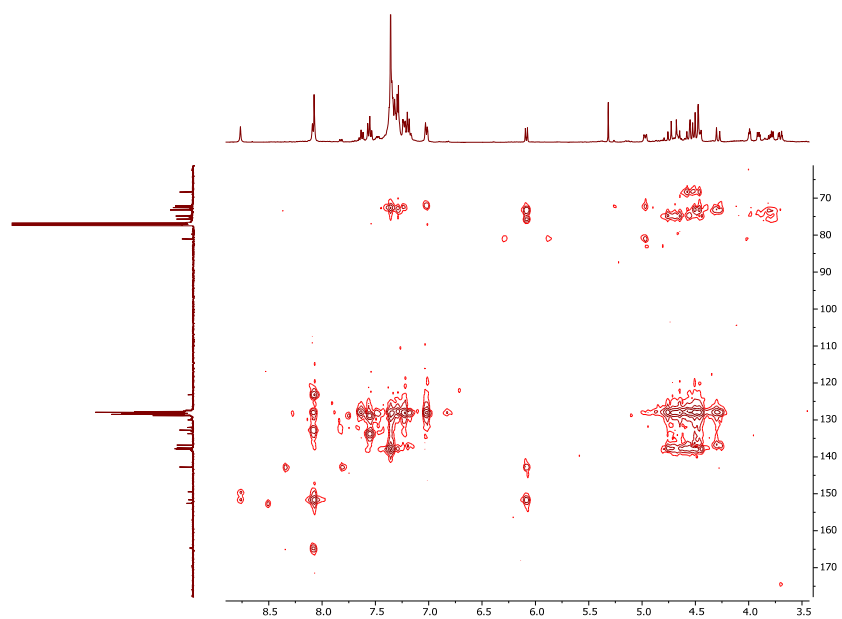

Figure S10. HMBC spectrum for compound 6.

Compound **7** (in CD<sub>3</sub>OD)

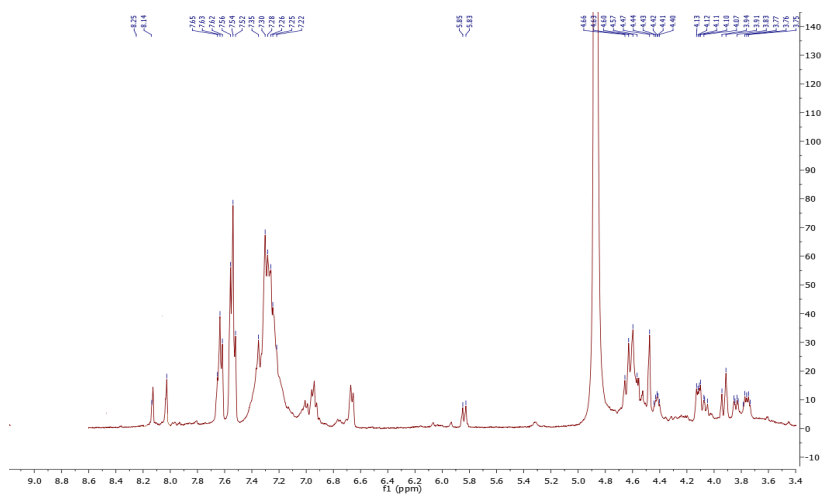

Figure S11. <sup>1</sup>H NMR spectrum for compound **7**.

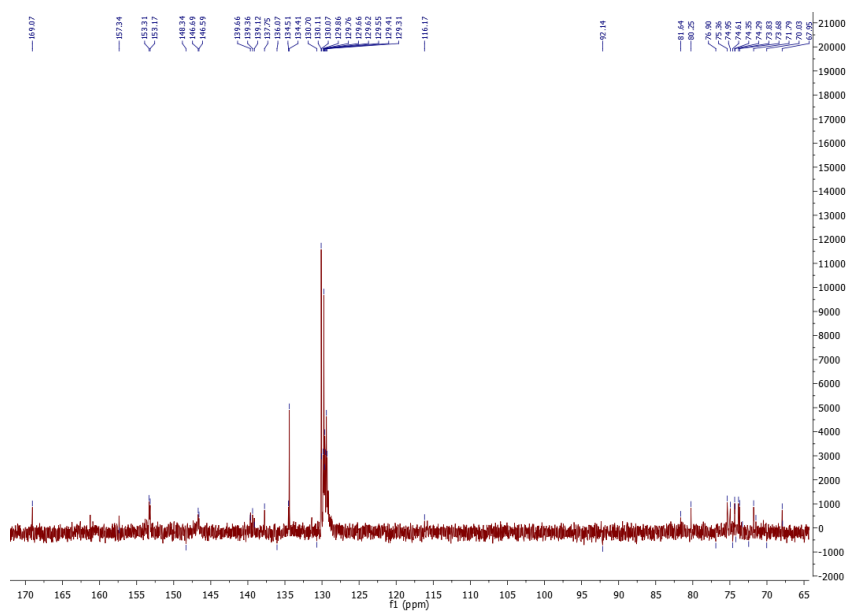

Figure S12. <sup>13</sup>C NMR spectrum for compound **7**.

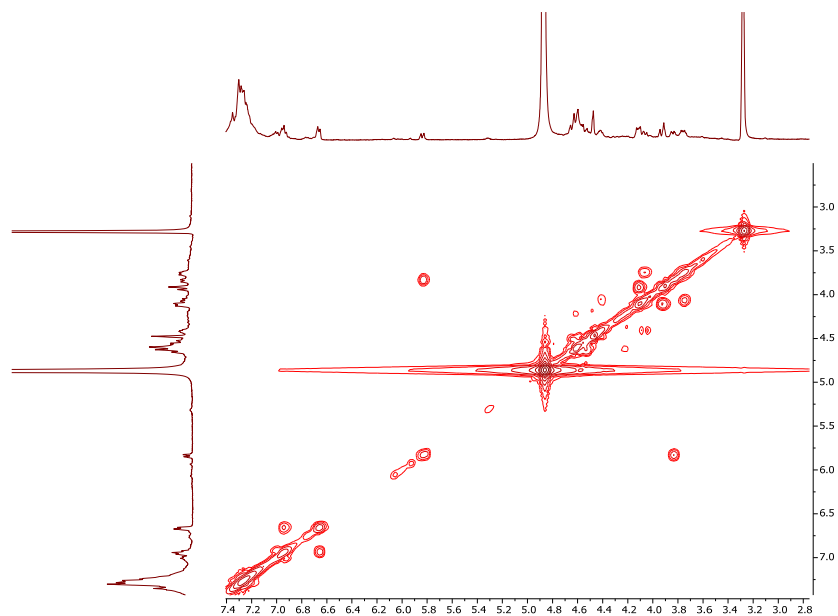

Figure S13. COSY spectrum for compound 7.

Compound **8** (in  $\text{CD}_3\text{OD}$ )

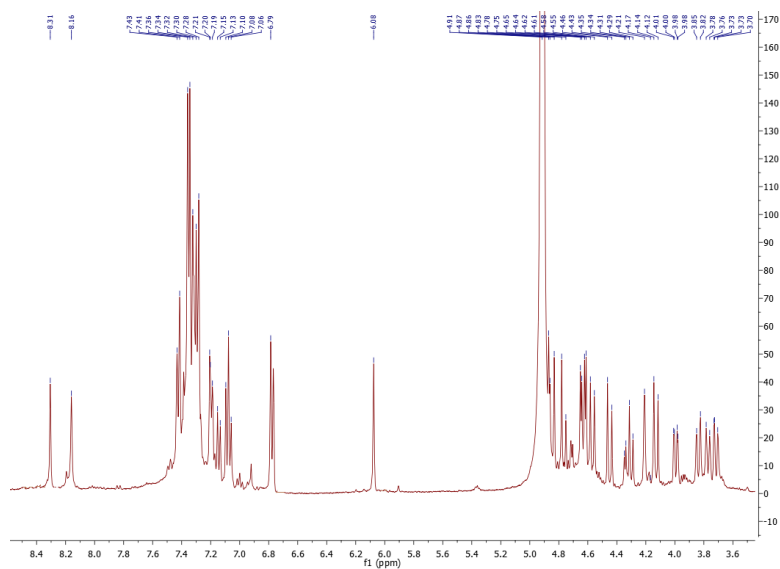

Figure S16. COSY spectrum for compound **8**.

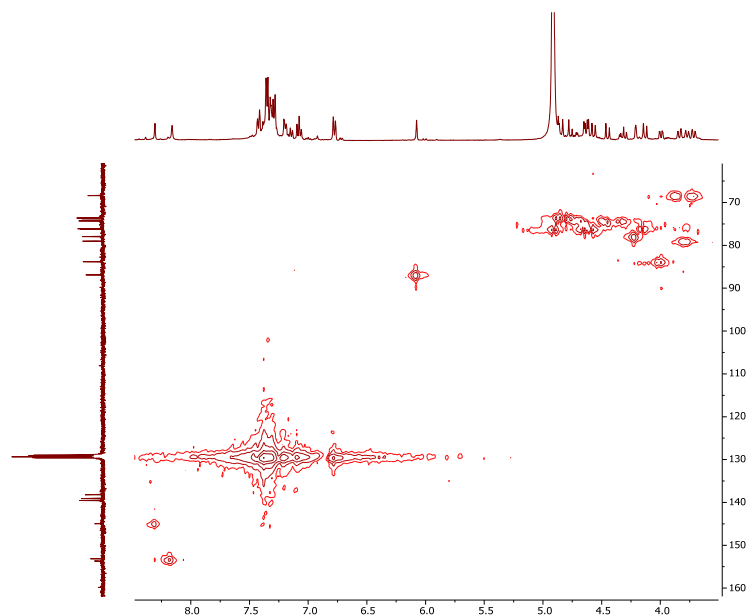Figure S17. HSQC spectrum for compound **8**.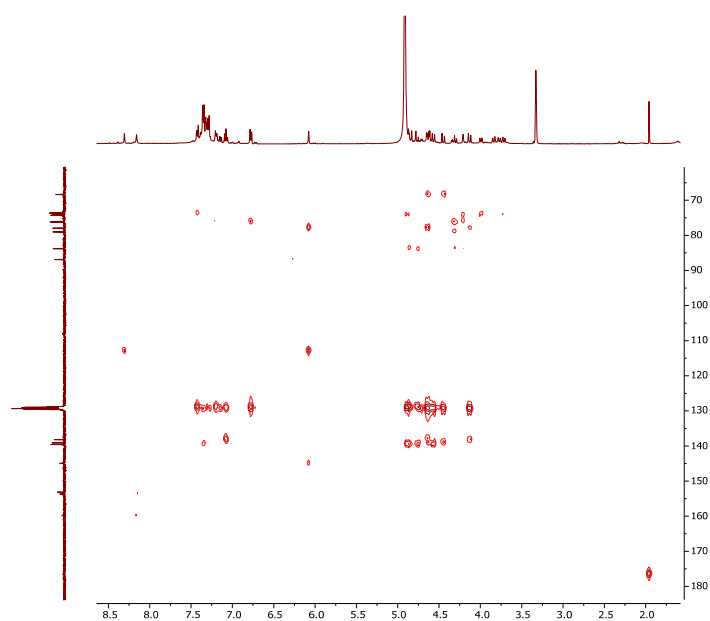Figure S18. HMBC spectrum for compound **8**.

Compound **9** (in CD<sub>3</sub>OD)

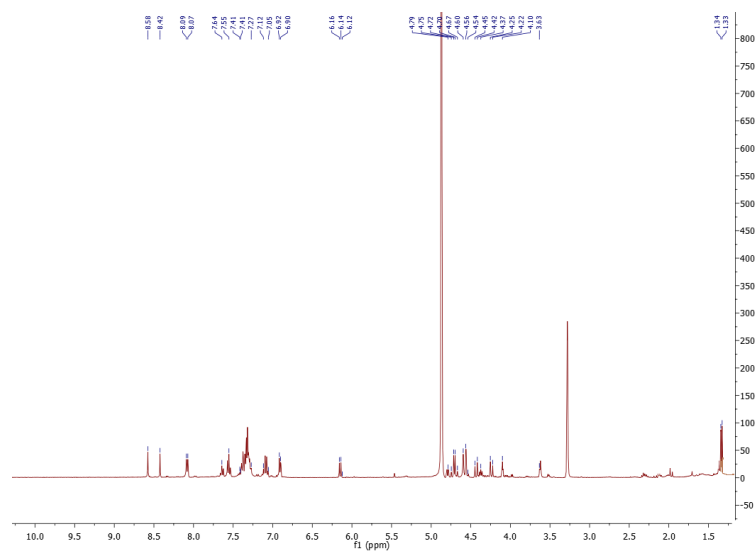

Figure S19. <sup>1</sup>H NMR spectrum for compound **9**.

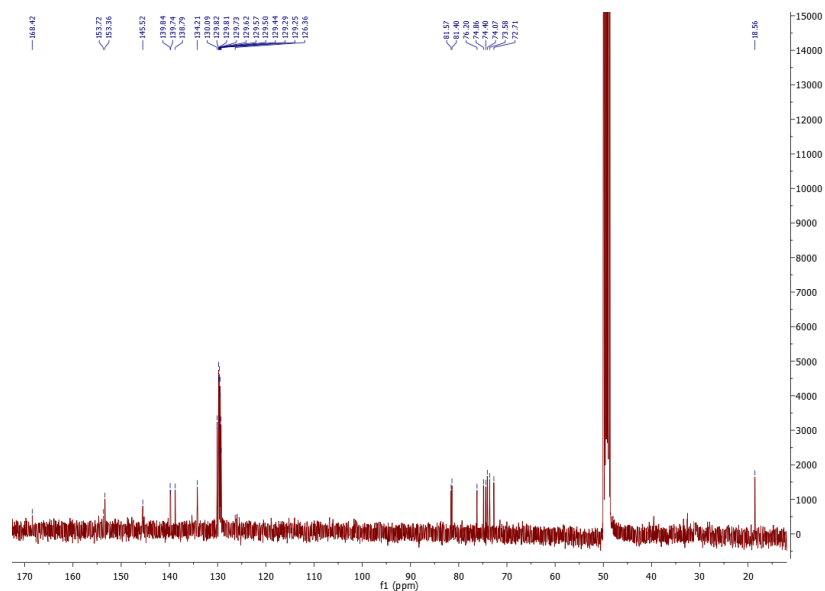

Figure S20. <sup>13</sup>C NMR spectrum for compound **9**.

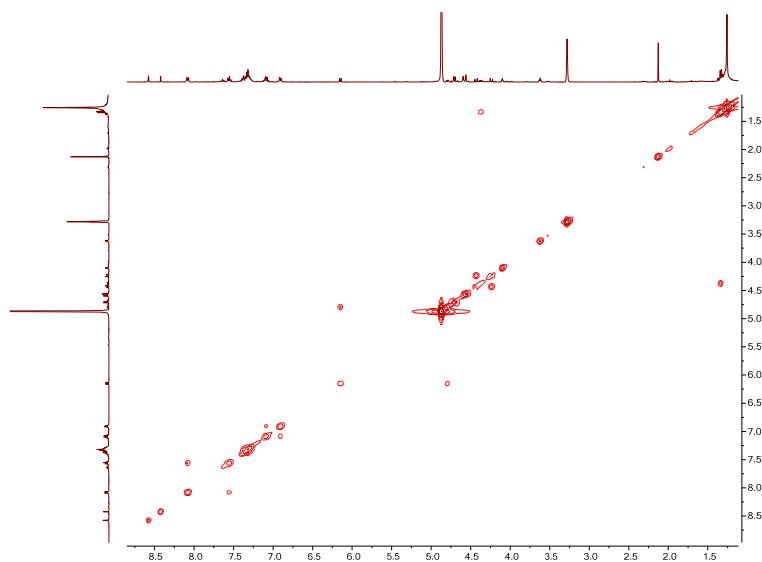Figure S21. COSY spectrum for compound **9**.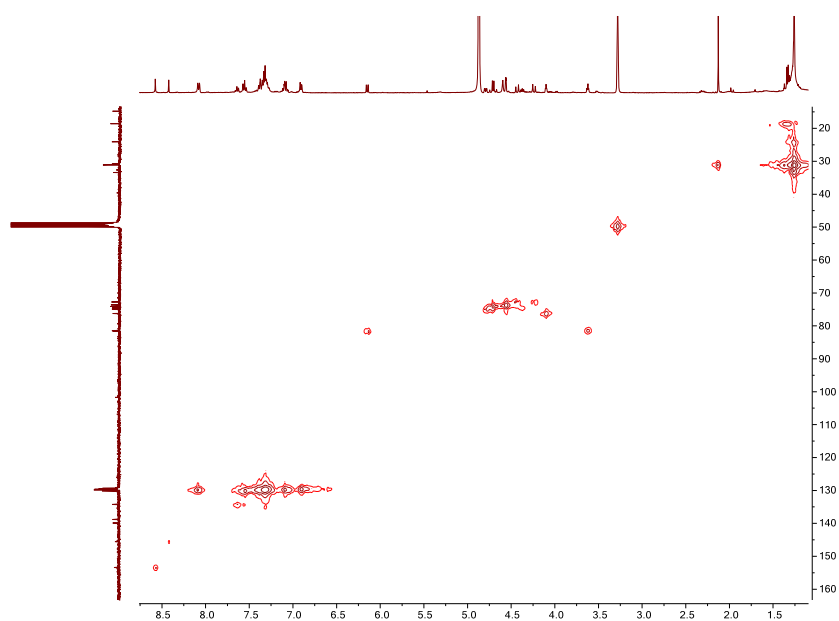Figure S22. HSQC spectrum for compound **9**.



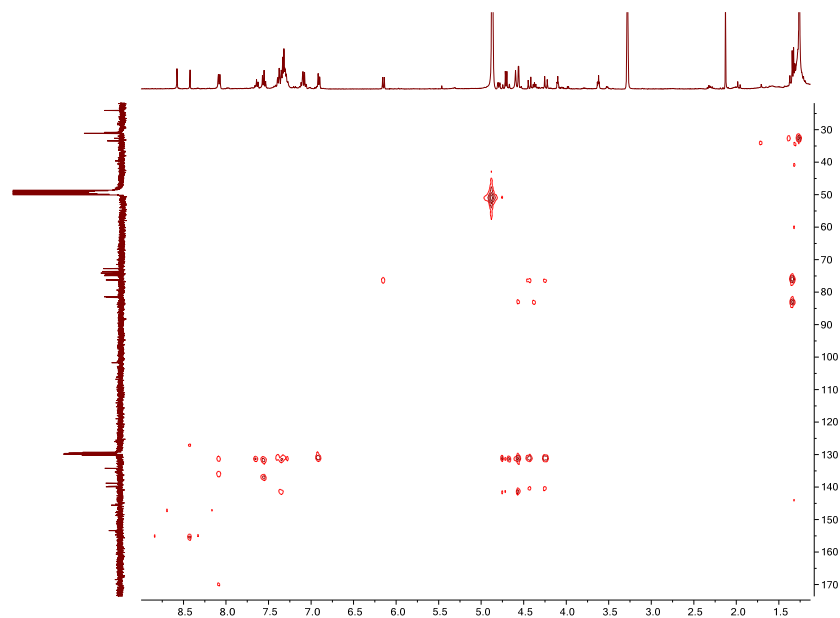Figure S23. HMBC spectrum for compound **9**.Compound **10** (in CD<sub>3</sub>OD)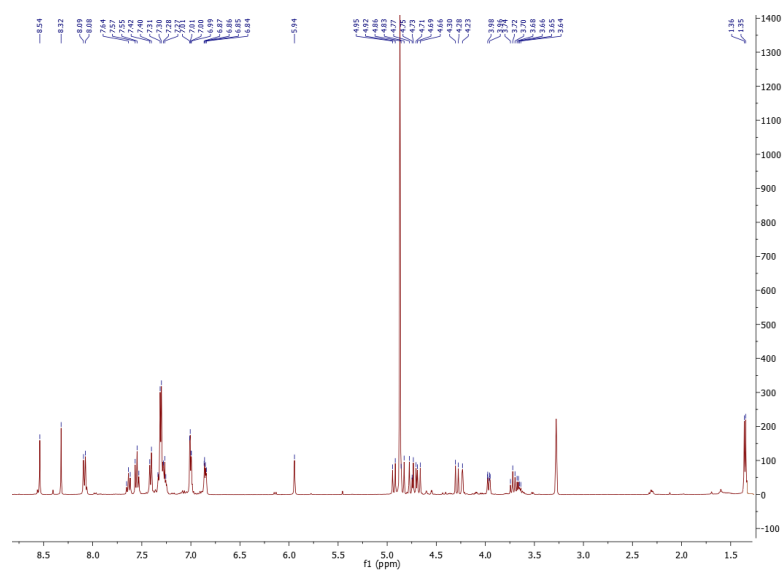Figure S24. <sup>1</sup>H NMR spectrum for compound **10**.

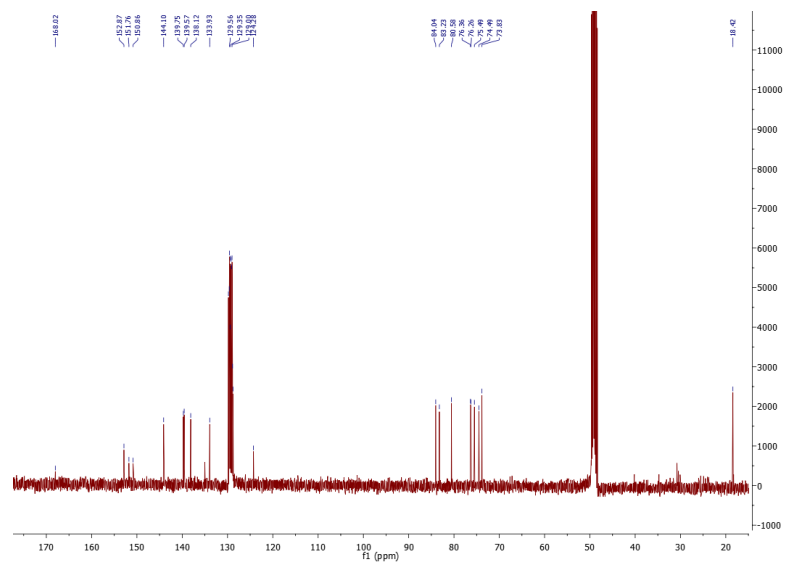Figure S25. <sup>13</sup>C NMR spectrum for compound **10**.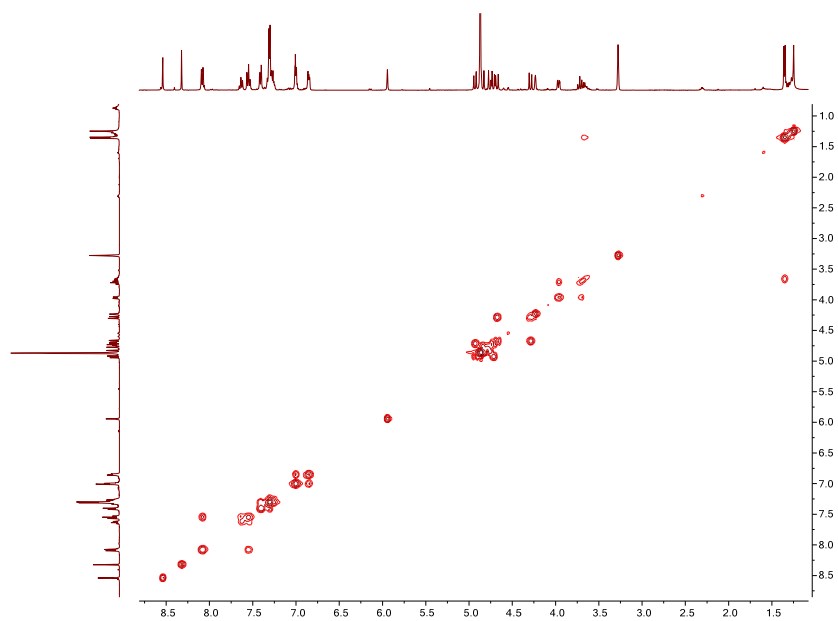Figure S26. COSY spectrum for compound **10**.

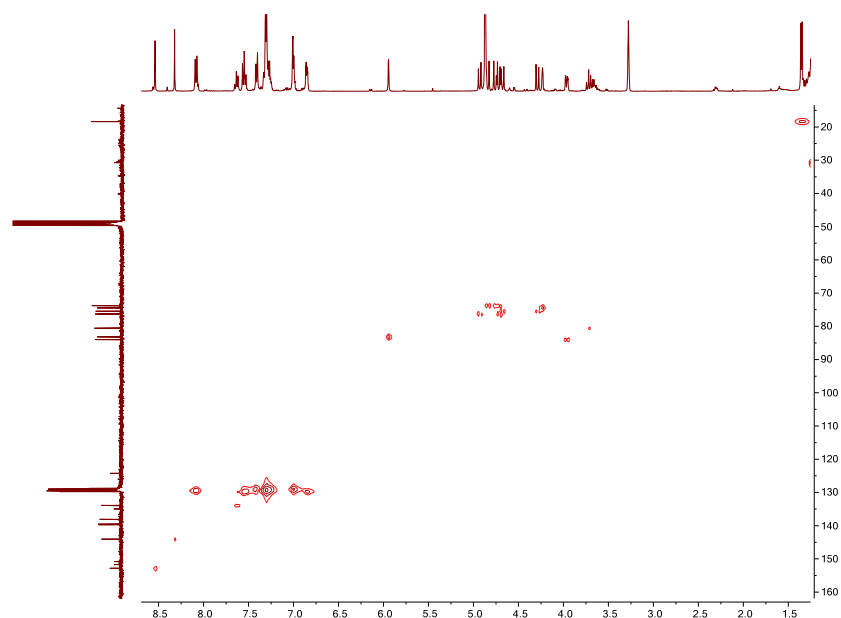Figure S27. HSQC spectrum for compound **10**.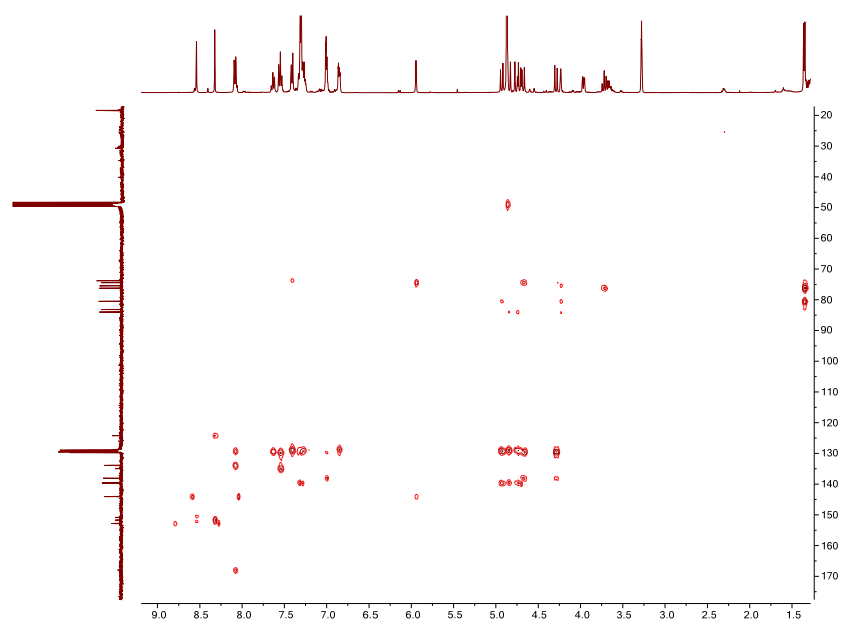Figure S28. HMBC spectrum for compound **10**.

Compound **12** (in CD<sub>3</sub>OD)

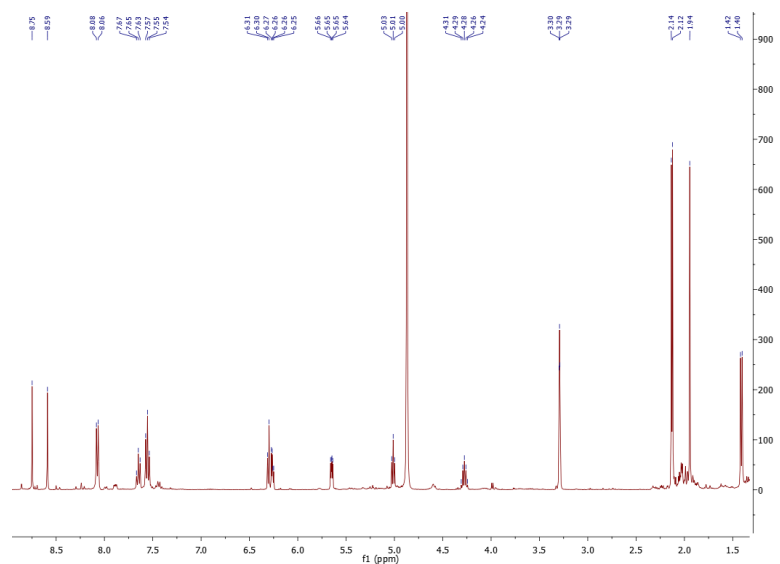

Figure S29. <sup>1</sup>H NMR spectrum for compound **12**.

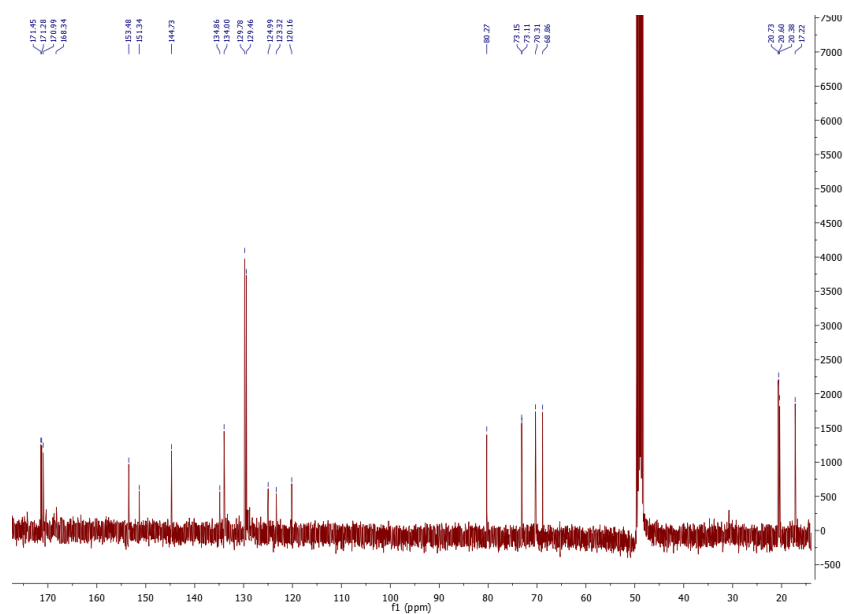

Figure S30. <sup>13</sup>C NMR spectrum for compound **12**.

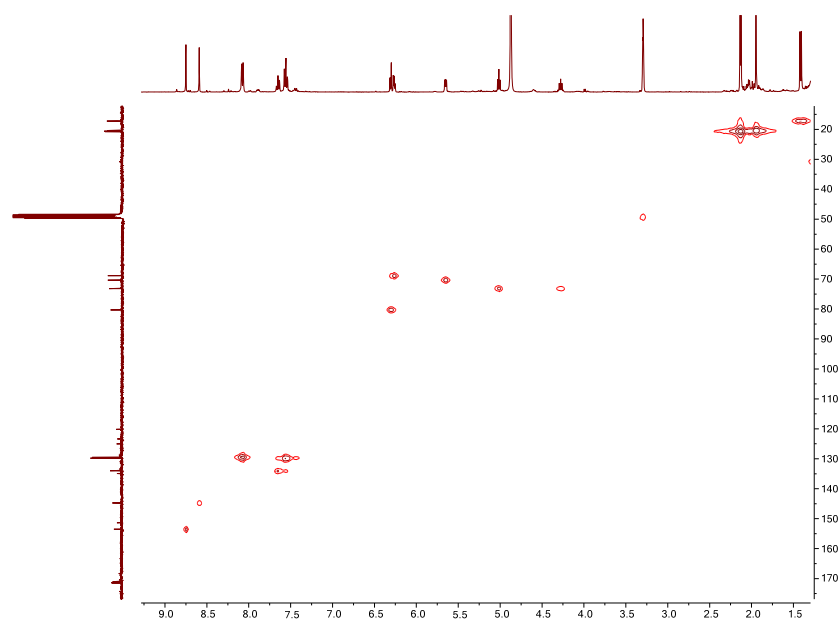Figure S31. HSQC spectrum for compound **12**.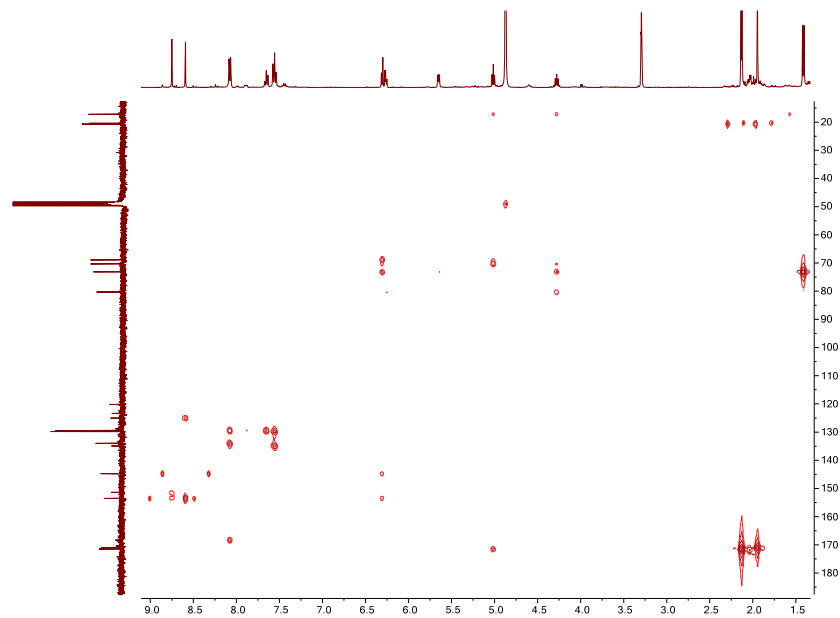Figure S32. HMBC spectrum for compound **12**.

Compound **13** (in CD<sub>3</sub>OD)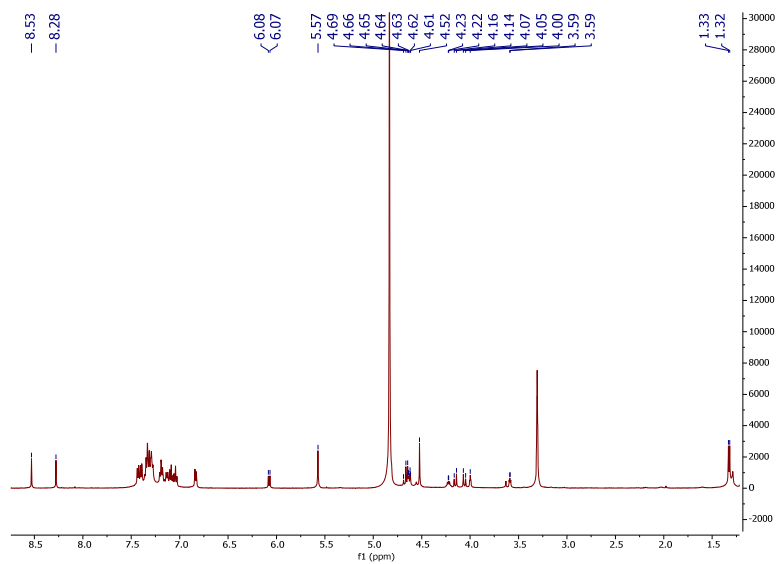Figure S33. <sup>1</sup>H NMR spectrum for compound **13**.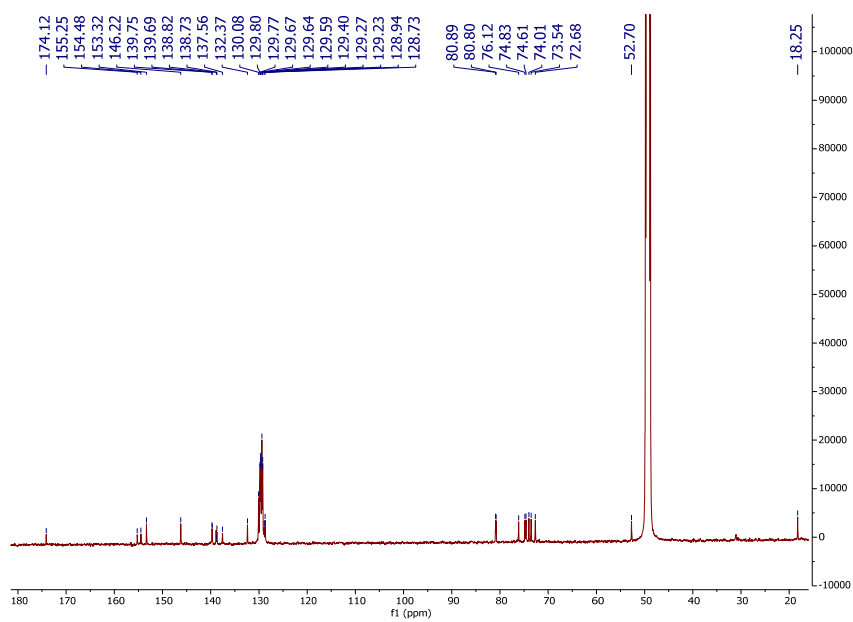Figure S34. <sup>13</sup>C NMR spectrum for compound **13**.

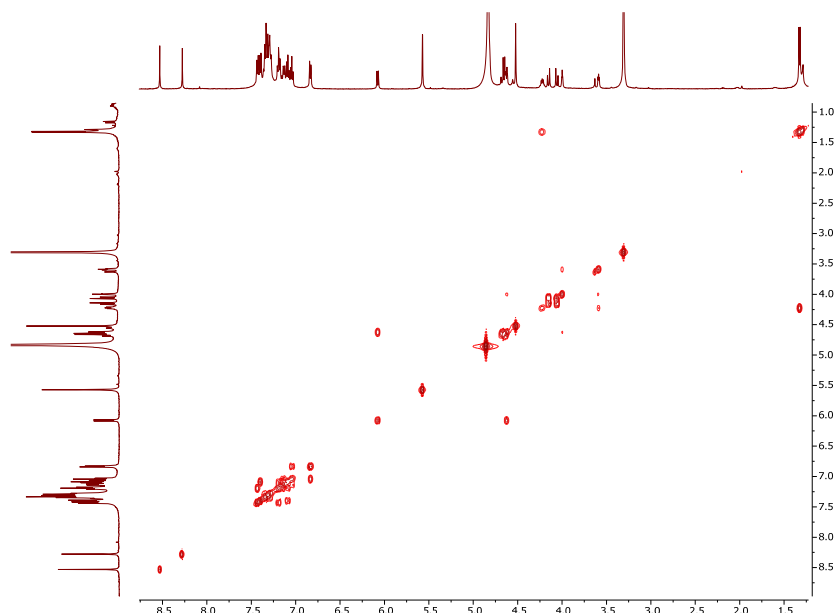Figure S35. COSY spectrum for compound **13**.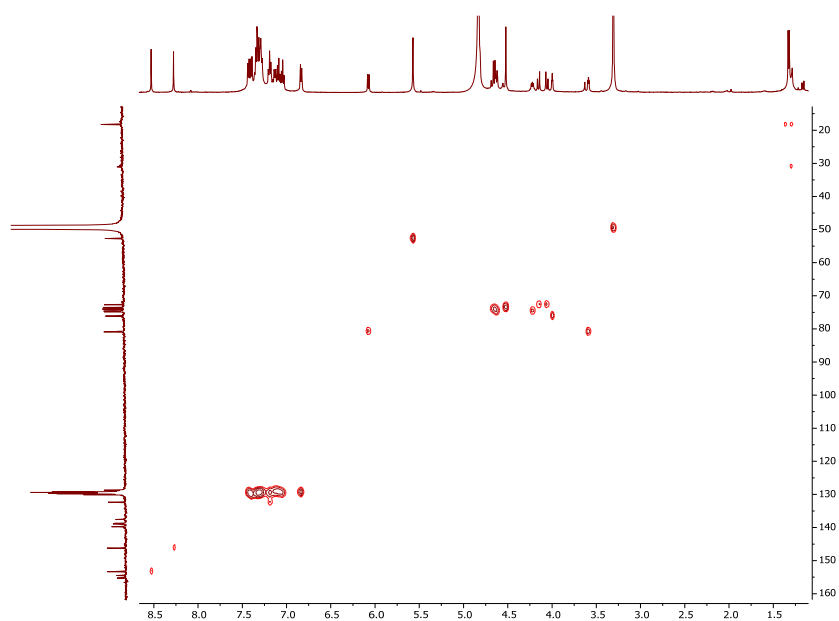Figure S36. HSQC spectrum for compound **13**.

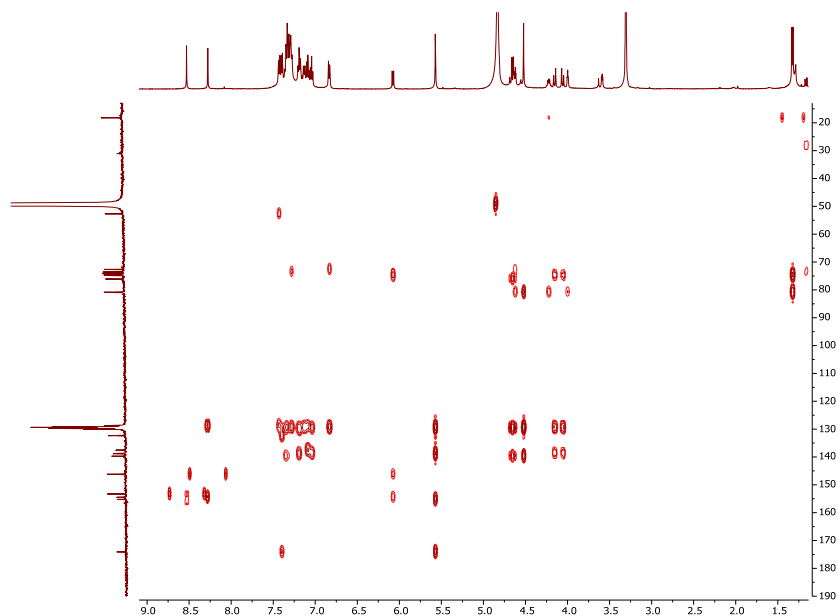Figure S37. HMBC spectrum for compound **13**.Compound **15** (in CD<sub>3</sub>OD)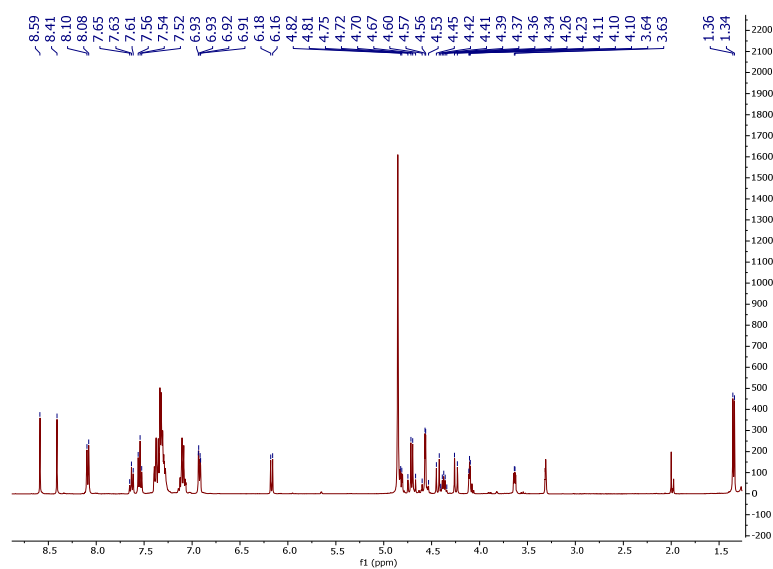Figure S38. <sup>1</sup>H NMR spectrum for compound **15**.



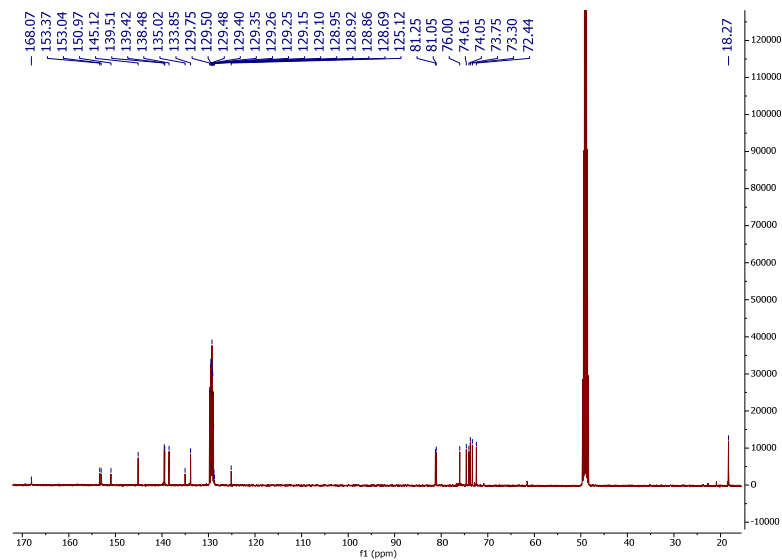Figure S39. <sup>13</sup>C NMR spectrum for compound **15**.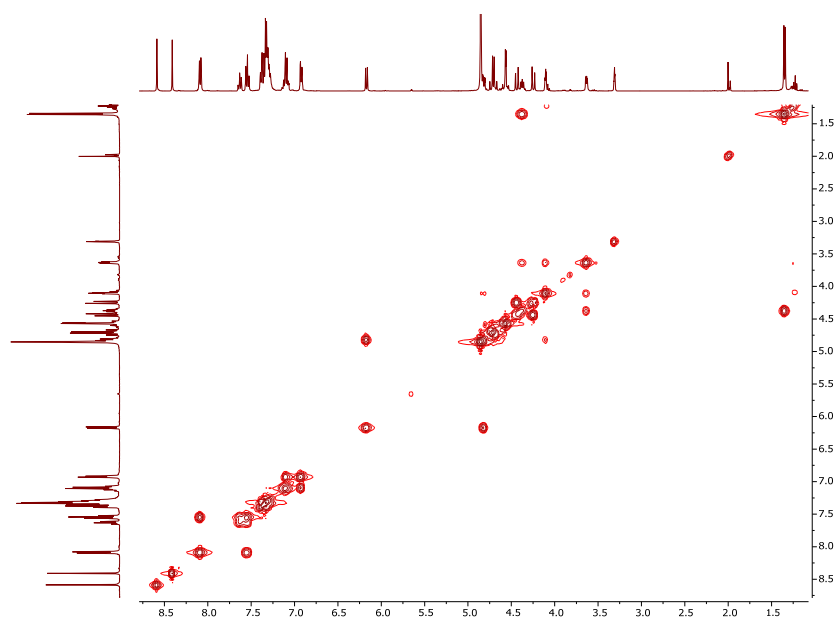Figure S40. COSY spectrum for compound **15**.

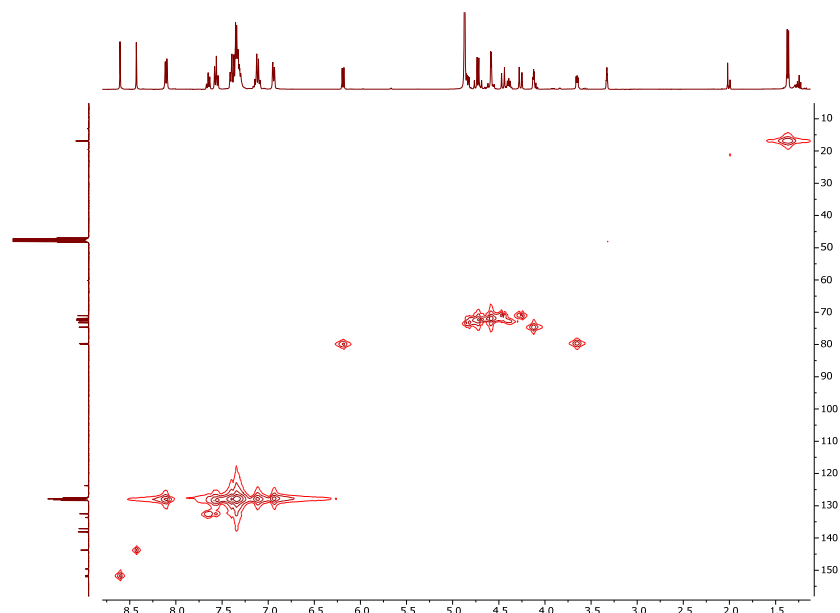Figure S41. HSQC spectrum for compound **15**.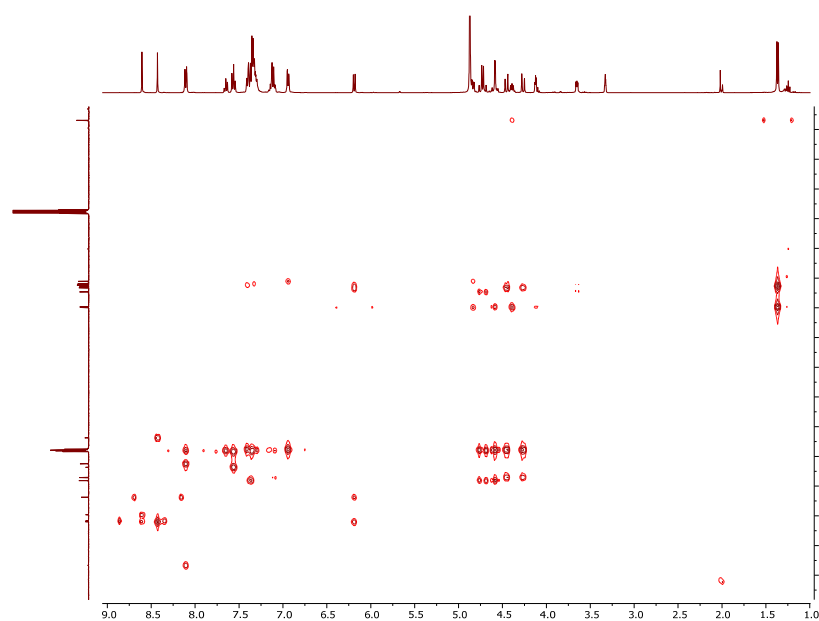Figure S42. HMBC spectrum for compound **15**.

Compound **16** (in CD<sub>3</sub>OD)

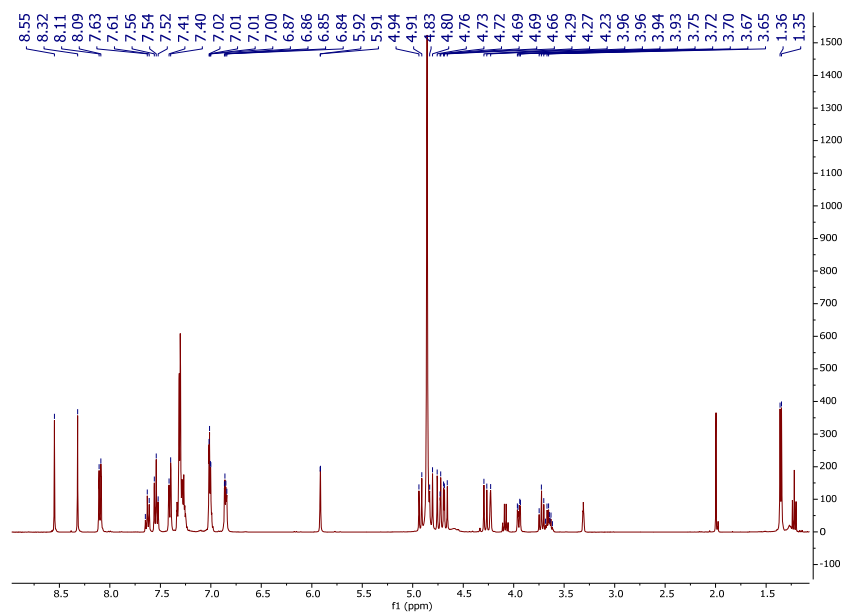

Figure S43. <sup>1</sup>H NMR spectrum for compound **16**.

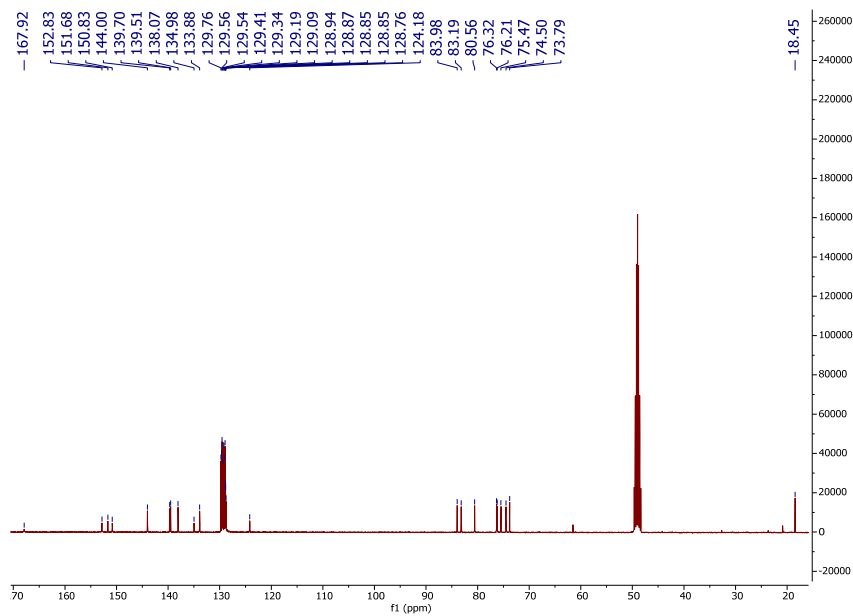

Figure S44. <sup>13</sup>C NMR spectrum for compound **16**.

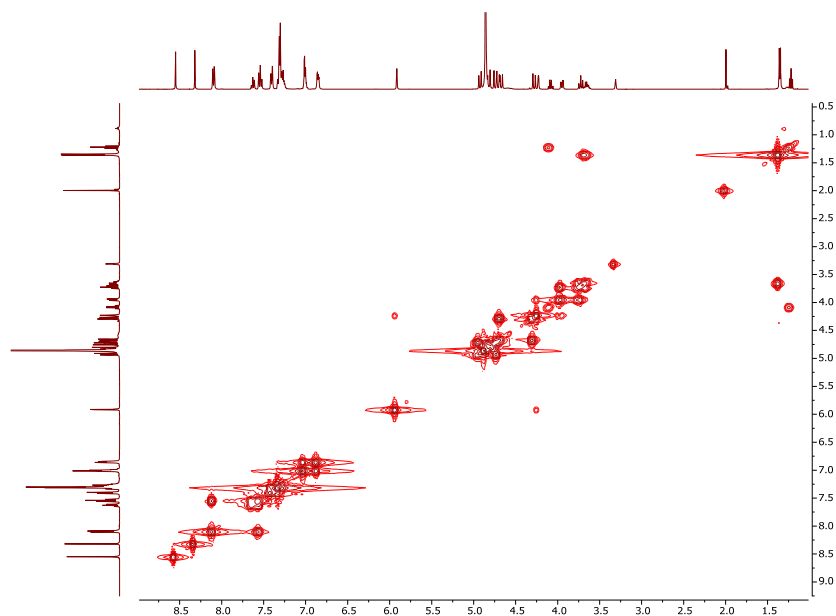Figure S45. COSY spectrum for compound **16**.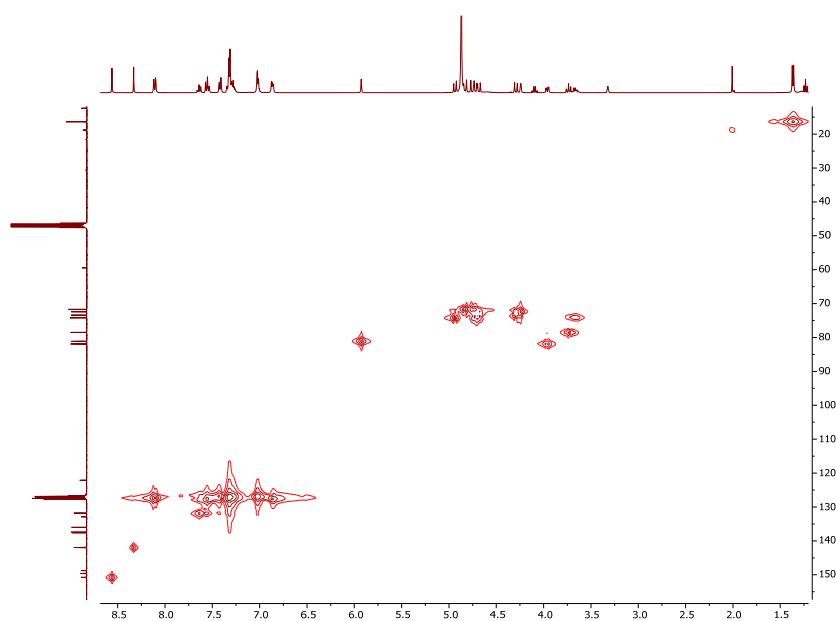Figure S46. HSQC spectrum for compound **16**.

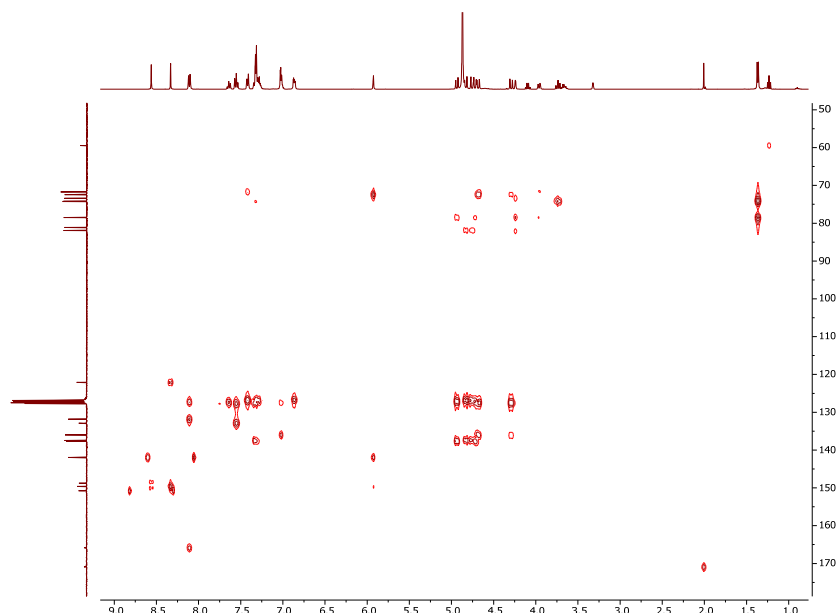

Figure S47. HMBC spectrum for compound **16**.

**<sup>1</sup>H NMR and <sup>13</sup>C NMR spectra by computational calculation****Table S1.** NMR chemical shifts calculated for compound **5**.

| H (paper)             | <sup>1</sup> H δ calc | <sup>1</sup> H δ exp      | C (paper)          | <sup>13</sup> C δ calc | <sup>13</sup> C δ exp |
|-----------------------|-----------------------|---------------------------|--------------------|------------------------|-----------------------|
| H-2                   | 8.36                  | 8.58                      | Ph                 | 126.8                  | 130.1-129.0           |
| H-8                   | 7.89                  | 8.42                      | Ph                 | 126.8                  | 130.1-129.0           |
| NH                    | 8.70                  | 7.36-6.89                 | Ph                 | 129.1                  | 130.1-129.0           |
| <i>ortho</i> PhCO     | 7.90                  | 8.09                      | Ph-Cq              | 137.6                  | 139.7                 |
| <i>ortho</i> PhCO     | 8.03                  | 8.09                      | Ph                 | 129.2                  | 130.1-129.0           |
| <i>meta</i> PhCO      | 7.54                  | 7.57                      | Ph                 | 126.8                  | 130.1-129.0           |
| <i>meta</i> PhCO      | 7.56                  | 7.57                      | CH <sub>2</sub> Ph | 72.6                   | 74.6                  |
| <i>para</i> PhCO      | 7.65                  | 7.65                      | C-6'               | 67.4                   | 70.2                  |
| H-4'                  | 3.93                  | 3.85                      | C-5'               | 73.2                   | 74.1                  |
| H-3'                  | 4.39                  | 4.11                      | C-1'               | 73.8                   | 81.9                  |
| H-5'                  | 4.26                  | 4.60-4.43                 | C-2'               | 76.8                   | 74.4                  |
| H-2'                  | 3.98                  | 4.78                      | C-3'               | 74.4                   | 75.8                  |
| H-1'                  | 5.99                  | 6.13                      | C-4'               | 74.5                   | 76.7                  |
| H-6'b                 | 4.06                  | 3.76                      | CH <sub>2</sub> Ph | 70.8                   | 73.4                  |
| H-6'a                 | 3.46                  | 3.65                      | Ph-Cq              | 137.2                  | 139.6                 |
| CH <sub>2</sub> Ph-2' | 3.97                  | 4.25, 4.22                | Ph                 | 129.4                  | 130.1-129.0           |
| CH <sub>2</sub> Ph-2' | 4.56                  | 4.60 -4.43                | Ph                 | 126.9                  | 130.1-129.0           |
| CH <sub>2</sub> Ph-4' | 4.09                  | 4.60-4.43                 | Ph                 | 126.9                  | 130.1-129.0           |
| CH <sub>2</sub> Ph-4' | 4.30                  | 4.60-4.43                 | Ph                 | 126.8                  | 130.1-129.0           |
| CH <sub>2</sub> Ph-3' | 4.57                  | 4.71, 4.68,<br>4.66, 4.63 | Ph                 | 129.1                  | 130.1-129.0           |
| CH <sub>2</sub> Ph-3' | 4.83                  | 4.71, 4.68,<br>4.66, 4.63 | CH <sub>2</sub> Ph | 74.9                   | 77.7                  |
| CH <sub>2</sub> Ph-6' | 3.80                  | 4.60-4.43                 | Ph-Cq              | 137.8                  | 139.7                 |
| CH <sub>2</sub> Ph-6' | 4.10                  | 4.60-4.43                 | Ph                 | 129.9                  | 130.1-129.0           |
| Ph-2'                 | 6.50                  | 7.36-6.89                 | Ph                 | 127.3                  | 130.1-129.0           |
| Ph-2'                 | 7.26                  | 7.36-6.89                 | Ph                 | 127.0                  | 130.1-129.0           |
| Ph-2'                 | 7.02                  | 7.36-6.89                 | Ph                 | 126.7                  | 130.1-129.0           |

|       |      |           |                    |       |             |
|-------|------|-----------|--------------------|-------|-------------|
| Ph-2' | 7.23 | 7.36-6.89 | Ph                 | 128.8 | 130.1-129.0 |
| Ph-2' | 7.19 | 7.36-6.89 | CH <sub>2</sub> Ph | 70.4  | 72.7        |
| Ph-3' | 7.76 | 7.36-6.89 | Ph-Cq              | 136.7 | 138.7       |
| Ph-3' | 7.17 | 7.36-6.89 | Ph                 | 128.8 | 130.1-129.0 |
| Ph-3' | 7.64 | 7.36-6.89 | Ph                 | 126.7 | 130.1-129.0 |
| Ph-3' | 7.34 | 7.36-6.89 | Ph                 | 126.7 | 130.1-129.0 |
| Ph-3' | 7.42 | 7.36-6.89 | Ph                 | 126.5 | 130.1-129.0 |
| Ph-4' | 7.48 | 7.36-6.89 | Ph                 | 128.0 | 130.1-129.0 |
| Ph-4' | 7.40 | 7.36-6.89 | C-4                | 148.9 | 156.6       |
| Ph-4' | 7.41 | 7.36-6.89 | C-5                | 119.3 | 127.9       |
| Ph-4' | 7.40 | 7.36-6.89 | C-8                | 139.1 | 145.6       |
| Ph-4' | 7.38 | 7.36-6.89 | C-6                | 147.6 | 150.5       |
| Ph-6' | 7.54 | 7.36-6.89 | C-2                | 149.8 | 153.4       |
| Ph-6' | 7.37 | 7.36-6.89 | CONH               | 162.9 | 167.4       |
| Ph-6' | 7.49 | 7.36-6.89 | Ph-Cq              | 133.8 | 134.4       |
| Ph-6' | 7.37 | 7.36-6.89 | Ph                 | 124.9 | 130.1-129.0 |
| Ph-6' | 7.38 | 7.36-6.89 | Ph                 | 126.9 | 130.1-129.0 |
|       |      |           | Ph                 | 131.9 | 134.3       |
|       |      |           | Ph                 | 127.5 | 130.1-129.0 |
|       |      |           | Ph                 | 128.2 | 130.1-129.0 |

**Table S2.** NMR chemical shifts calculated for compound **6**.

| H (paper)         | <sup>1</sup> H δ calc | <sup>1</sup> H δ exp | C (paper) | <sup>13</sup> C δ calc | <sup>13</sup> C δ exp |
|-------------------|-----------------------|----------------------|-----------|------------------------|-----------------------|
| H-2               | 8.49                  | 8.77                 | C-4       | 147.6                  | 151.6                 |
| H-8               | 8.14                  | 8.09                 | C-5       | 118.8                  | 123.2                 |
| NH                | 8.72                  | 7.37-7.01            | C-6       | 147.4                  | 149.6                 |
| <i>ortho</i> PhCO | 7.85                  | 8.08                 | C-2       | 149.6                  | 152.6                 |
| <i>ortho</i> PhCO | 8.05                  | 8.08                 | C-8       | 141.5                  | 142.8                 |
| <i>meta</i> PhCO  | 7.52                  | 7.55                 | CONH      | 162.7                  | 164.6                 |
| <i>meta</i> PhCO  | 7.56                  | 7.55                 | Ph-Cq     | 133.6                  | 136.8                 |
| <i>para</i> PhCO  | 7.64                  | 7.63                 | Ph        | 124.8                  | 127.8-128.9           |

|                       |      |            |                    |       |             |
|-----------------------|------|------------|--------------------|-------|-------------|
| H-4'                  | 4.35 | 3.91       | Ph                 | 128.2 | 127.8-128.9 |
| H-3'                  | 3.86 | 3.99       | Ph                 | 126.9 | 127.8-128.9 |
| H-5'                  | 3.43 | 4.55-4.43  | Ph                 | 127.5 | 127.8-128.9 |
| H-2'                  | 4.10 | 4.97       | Ph                 | 131.9 | 127.8-128.9 |
| H-1'                  | 5.87 | 6.08       | C-4'               | 70.7  | 74.9, 74.8  |
| H-6'b                 | 3.67 | 3.71       | C-3'               | 82.9  | 74.9, 74.8  |
| H-6'a                 | 4.22 | 3.78       | C-5'               | 80.2  | 75.7        |
| CH <sub>2</sub> Ph-2' | 4.84 | 4.55-4.43  | C-2'               | 72.7  | 73.2        |
| CH <sub>2</sub> Ph-2' | 3.96 | 4.55-4.43  | C-1'               | 78.1  | 81.1        |
| CH <sub>2</sub> Ph-3' | 4.78 | 4.68, 4.65 | C-6'               | 68.0  | 68.4        |
| CH <sub>2</sub> Ph-3' | 5.16 | 4.76, 4.73 | CH <sub>2</sub> Ph | 74.2  | 73.2        |
| CH <sub>2</sub> Ph-4' | 4.87 | 4.55-4.43  | CH <sub>2</sub> Ph | 67.9  | 72.1        |
| CH <sub>2</sub> Ph-4' | 4.37 | 4.55-4.43  | CH <sub>2</sub> Ph | 73.8  | 72.4        |
| CH <sub>2</sub> Ph-6' | 4.67 | 4.55-4.43  | CH <sub>2</sub> Ph | 74.1  | 72.4        |
| CH <sub>2</sub> Ph-6' | 4.08 | 4.30, 4.27 | Ph-Cq              | 137.3 | 137.5       |
| Ph-2'                 | 7.84 | 7.37-7.01  | Ph                 | 129.9 | 127.8-128.9 |
| Ph-2'                 | 7.31 | 7.37-7.01  | Ph                 | 129.4 | 127.8-128.9 |
| Ph-2'                 | 7.69 | 7.37-7.01  | Ph                 | 127.4 | 127.8-128.9 |
| Ph-2'                 | 7.42 | 7.37-7.01  | Ph                 | 127.0 | 127.8-128.9 |
| Ph-2'                 | 7.51 | 7.37-7.01  | Ph                 | 127.2 | 127.8-128.9 |
| Ph-3'                 | 8.00 | 7.37-7.01  | Ph-Cq              | 139.2 | 137.9       |
| Ph-3'                 | 7.26 | 7.37-7.01  | Ph                 | 122.5 | 127.8-128.9 |
| Ph-3'                 | 7.49 | 7.37-7.01  | Ph                 | 123.4 | 127.8-128.9 |
| Ph-3'                 | 7.38 | 7.37-7.01  | Ph                 | 127.1 | 127.8-128.9 |
| Ph-3'                 | 7.25 | 7.37-7.01  | Ph                 | 126.5 | 127.8-128.9 |
| Ph-4'                 | 7.10 | 7.37-7.01  | Ph                 | 124.4 | 127.8-128.9 |
| Ph-4'                 | 7.29 | 7.37-7.01  | Ph-Cq              | 137.7 | 137.5       |
| Ph-4'                 | 7.17 | 7.37-7.01  | Ph                 | 129.0 | 127.8-128.9 |
| Ph-4'                 | 7.29 | 7.37-7.01  | Ph                 | 129.1 | 127.8-128.9 |
| Ph-4'                 | 7.25 | 7.37-7.01  | Ph                 | 126.6 | 127.8-128.9 |
| Ph-6'                 | 6.71 | 7.37-7.01  | Ph                 | 126.7 | 127.8-128.9 |
| Ph-6'                 | 7.41 | 7.37-7.01  | Ph                 | 126.6 | 127.8-128.9 |



|       |      |           |       |       |             |
|-------|------|-----------|-------|-------|-------------|
| Ph-6' | 7.26 | 7.37-7.01 | Ph-Cq | 138.3 | 137.7       |
| Ph-6' | 7.38 | 7.37-7.01 | Ph    | 128.6 | 127.8-128.9 |
| Ph-6' | 7.34 | 7.37-7.01 | Ph    | 129.2 | 127.8-128.9 |
|       |      |           | Ph    | 126.4 | 127.8-128.9 |
|       |      |           | Ph    | 126.8 | 127.8-128.9 |
|       |      |           | Ph    | 126.5 | 127.8-128.9 |

**Table S3.** NMR chemical shifts calculated for compound **7**.

| H (paper)             | <sup>1</sup> H δ calc | <sup>1</sup> H δ exp | C (paper)          | <sup>13</sup> C δ calc | <sup>13</sup> C δ exp |
|-----------------------|-----------------------|----------------------|--------------------|------------------------|-----------------------|
| H-2                   | 8.61                  | 8.25                 | C-4                | 159.7                  | 157.3                 |
| H-8                   | 8.09                  | 8.14                 | C-5                | 117.2                  | 116.2                 |
| NH                    | 7.46                  | 7.35-6.60            | C-6                | 141.7                  | 153.2                 |
| <i>ortho</i> PhCO     | 7.68                  | 7.35-6.60            | C-2                | 149.3                  | 153.3                 |
| <i>ortho</i> PhCO     | 7.66                  | 7.35-6.60            | C-8                | 145.6                  | 146.7                 |
| <i>meta</i> PhCO      | 7.35                  | 7.35-6.60            | CONH               | 164.8                  | 169.1                 |
| <i>meta</i> PhCO      | 7.10                  | 7.35-6.60            | Ph-Cq              | 132.8                  | 136.1                 |
| <i>para</i> PhCO      | 7.38                  | 7.35-6.60            | Ph                 | 124.9                  | 129.9-129.3           |
| H-4'                  | 3.94                  | 4.12-4.06            | Ph                 | 128.0                  | 129.9-129.3           |
| H-3'                  | 4.18                  | 4.66-4.40            | Ph                 | 126.6                  | 129.9-129.3           |
| H-5'                  | 4.39                  | 3.91                 | Ph                 | 127.4                  | 129.9-129.3           |
| H-2'                  | 3.81                  | 3.85                 | Ph                 | 131.6                  | 134.5                 |
| H-1'                  | 5.94                  | 5.84                 | C-4'               | 74.2                   | 73.7                  |
| H-6'a                 | 4.18                  | 4.12-4.06            | C-3'               | 75.0                   | 80.3                  |
| H-6'b                 | 3.64                  | 3.75                 | C-5'               | 73.7                   | 71.8                  |
| CH <sub>2</sub> Ph-2' | 4.01                  | 4.66-4.40            | C-2'               | 77.5                   | 74.4                  |
| CH <sub>2</sub> Ph-2' | 4.80                  | 4.66-4.40            | C-1'               | 76.5                   | 81.6                  |
| CH <sub>2</sub> Ph-4' | 4.07                  | 4.66-4.40            | C-6'               | 67.5                   | 67.9                  |
| CH <sub>2</sub> Ph-4' | 4.32                  | 4.66-4.40            | CH <sub>2</sub> Ph | 67.3                   | 73.8                  |
| CH <sub>2</sub> Ph-3' | 4.39                  | 4.66-4.40            | CH <sub>2</sub> Ph | 70.9                   | 74.3                  |
| CH <sub>2</sub> Ph-3' | 4.61                  | 4.66-4.40            | CH <sub>2</sub> Ph | 75.1                   | 75.4                  |
| CH <sub>2</sub> Ph-6' | 4.15                  | 4.66-4.40            | CH <sub>2</sub> Ph | 72.9                   | 75.0                  |

|                       |      |           |       |       |             |
|-----------------------|------|-----------|-------|-------|-------------|
| CH <sub>2</sub> Ph-6' | 4.30 | 4.66-4.40 | Ph-Cq | 138.0 | 139.1       |
| Ph-2'                 | 7.00 | 7.35-6.60 | Ph    | 121.8 | 129.9-129.3 |
| Ph-2'                 | 6.96 | 7.35-6.60 | Ph    | 123.0 | 129.9-129.3 |
| Ph-2'                 | 7.21 | 7.35-6.60 | Ph    | 126.7 | 129.9-129.3 |
| Ph-2'                 | 7.21 | 7.35-6.60 | Ph    | 126.2 | 129.9-129.3 |
| Ph-2'                 | 7.12 | 7.35-6.60 | Ph    | 124.3 | 129.9-129.3 |
| Ph-3'                 | 7.48 | 7.35-6.60 | Ph-Cq | 138.7 | 139.7       |
| Ph-3'                 | 6.80 | 7.35-6.60 | Ph    | 124.8 | 129.9-129.3 |
| Ph-3'                 | 7.40 | 7.35-6.60 | Ph    | 124.8 | 129.9-129.3 |
| Ph-3'                 | 7.29 | 7.35-6.60 | Ph    | 126.8 | 129.9-129.3 |
| Ph-3'                 | 7.26 | 7.35-6.60 | Ph    | 126.7 | 129.9-129.3 |
| Ph-4'                 | 7.45 | 7.35-6.60 | Ph    | 125.8 | 129.9-129.3 |
| Ph-4'                 | 7.42 | 7.35-6.60 | Ph-Cq | 137.1 | 137.8       |
| Ph-4'                 | 7.40 | 7.35-6.60 | Ph    | 129.5 | 134.4       |
| Ph-4'                 | 7.41 | 7.35-6.60 | Ph    | 129.0 | 130.1       |
| Ph-4'                 | 7.38 | 7.35-6.60 | Ph    | 126.9 | 129.9-129.3 |
| Ph-6'                 | 7.55 | 7.35-6.60 | Ph    | 126.8 | 129.9-129.3 |
| Ph-6'                 | 7.49 | 7.35-6.60 | Ph    | 126.9 | 129.9-129.3 |
| Ph-6'                 | 7.41 | 7.35-6.60 | Ph-Cq | 137.8 | 139.4       |
| Ph-6'                 | 7.41 | 7.35-6.60 | Ph    | 128.6 | 130.0       |
| Ph-6'                 | 7.37 | 7.35-6.60 | Ph    | 129.4 | 130.7       |
|                       |      |           | Ph    | 126.7 | 129.9-129.3 |
|                       |      |           | Ph    | 126.9 | 129.9-129.3 |
|                       |      |           | Ph    | 126.8 | 129.9-129.3 |

**Table S4.** NMR chemical shifts calculated for compound **9**.

| H (paper)         | <sup>1</sup> H δ calc | <sup>1</sup> H δ exp | C (paper) | <sup>13</sup> C δ calc | <sup>13</sup> C δ exp |
|-------------------|-----------------------|----------------------|-----------|------------------------|-----------------------|
| H-2               | 8.35                  | 8.58                 | C-4       | 148.8                  | 153.7                 |
| H-8               | 7.90                  | 8.42                 | C-5       | 119.2                  | 126.4                 |
| NH                | 8.73                  | 7.40-7.27            | C-6       | 147.5                  | 153.4                 |
| <i>ortho</i> PhCO | 7.91                  | 8.08                 | C-2       | 149.7                  | 153.4                 |

|                      |      |                           |                      |       |             |
|----------------------|------|---------------------------|----------------------|-------|-------------|
| <i>ortho</i> PhCO    | 8.04 | 8.08                      | C-8                  | 139.2 | 145.5       |
| <i>meta</i> PhCO     | 7.54 | 7.55                      | CONH                 | 162.8 | 168.4       |
| <i>meta</i> PhCO     | 7.56 | 7.55                      | Ph-Cq                | 133.7 | 134.2       |
| <i>para</i> PhCO     | 7.64 | 7.64                      | Ph                   | 124.8 | 129.2-130.1 |
| H-4'                 | 3.69 | 3.62                      | Ph                   | 128.2 | 129.2-130.1 |
| H-3'                 | 4.33 | 4.10                      | Ph                   | 126.9 | 129.2-130.1 |
| H-5'                 | 4.39 | 4.37                      | Ph                   | 127.5 | 129.2-130.1 |
| H-2'                 | 3.94 | 4.79                      | Ph                   | 131.9 | 129.2-130.1 |
| H-1'                 | 6.05 | 6.15                      | C-4'                 | 78.6  | 81.4        |
| CH3                  | 1.96 | 1.34                      | C-3'                 | 74.3  | 76.2        |
| CH3                  | 1.12 | 1.34                      | C-5'                 | 71.8  | 74.4        |
| CH3                  | 1.00 | 1.34                      | C-2'                 | 77.4  | 74.9        |
| OCH <sub>2</sub> -2' | 3.97 | 4.25, 4.22                | C-1'                 | 72.2  | 81.6        |
| OCH <sub>2</sub> -2' | 4.54 | 4.45, 4.42                | C-6'                 | 16.1  | 18.6        |
| OCH <sub>2</sub> -4' | 4.29 | 4.59, 4.56,<br>4.56, 4.53 | OCH <sub>2</sub> -2' | 70.6  | 72.7        |
| OCH <sub>2</sub> -4' | 4.48 | 4.59, 4.56,<br>4.56, 4.53 | OCH <sub>2</sub> -4' | 71.0  | 73.6        |
| OCH <sub>2</sub> -3' | 4.50 | 4.75, 4.72,<br>4.70, 4.67 | OCH <sub>2</sub> -3' | 74.6  | 74.1        |
| OCH <sub>2</sub> -3' | 4.75 | 4.75, 4.72,<br>4.70, 4.67 | Ph-Cq                | 136.8 | 139.7       |
| Ph-2'                | 6.45 | 6.91                      | Ph                   | 128.7 | 129.2-130.1 |
| Ph-2'                | 7.22 | 7.40-7.27                 | Ph                   | 127.8 | 129.2-130.1 |
| Ph-2'                | 7.00 | 6.91                      | Ph                   | 126.6 | 129.2-130.1 |
| Ph-2'                | 7.20 | 7.12-7.05                 | Ph                   | 126.4 | 129.2-130.1 |
| Ph-2'                | 7.17 | 7.12-7.05                 | Ph                   | 126.7 | 129.2-130.1 |
| Ph-3'                | 7.53 | 7.40-7.27                 | Ph-Cq                | 137.6 | 139.8       |
| Ph-3'                | 7.13 | 7.12-7.05                 | Ph                   | 129.4 | 129.2-130.1 |
| Ph-3'                | 7.43 | 7.40-7.27                 | Ph                   | 129.0 | 129.2-130.1 |
| Ph-3'                | 7.29 | 7.40-7.27                 | Ph                   | 126.9 | 129.2-130.1 |
| Ph-3'                | 7.36 | 7.40-7.27                 | Ph                   | 126.7 | 129.2-130.1 |
| Ph-4'                | 7.58 | 7.40-7.27                 | Ph                   | 126.9 | 129.2-130.1 |

|       |      |           |       |       |             |
|-------|------|-----------|-------|-------|-------------|
| Ph-4' | 7.45 | 7.40-7.27 | Ph-Cq | 137.4 | 138.8       |
| Ph-4' | 7.46 | 7.40-7.27 | Ph    | 129.5 | 129.2-130.1 |
| Ph-4' | 7.43 | 7.40-7.27 | Ph    | 129.1 | 129.2-130.1 |
| Ph-4' | 7.41 | 7.40-7.27 | Ph    | 127.0 | 129.2-130.1 |
|       |      |           | Ph    | 126.8 | 129.2-130.1 |
|       |      |           | Ph    | 126.9 | 129.2-130.1 |

**Table S5.** NMR chemical shifts calculated for compound **12**, “conformer a”.

| H (paper)           | <sup>1</sup> H δ calc | <sup>1</sup> H δ exp | C (paper)       | <sup>13</sup> C δ calc | <sup>13</sup> C δ exp |
|---------------------|-----------------------|----------------------|-----------------|------------------------|-----------------------|
| H-2                 | 8.47                  | 8.75                 | C-4             | 148.5                  | 153.5                 |
| H-8                 | 7.87                  | 8.59                 | C-5             | 119.0                  | 125.0                 |
| NH                  | 8.67                  | 7.57-7.54            | C-6             | 147.6                  | 151.3                 |
| <i>ortho</i> PhCO   | 7.83                  | 8.07                 | C-2             | 150.1                  | 153.5                 |
| <i>ortho</i> PhCO   | 8.02                  | 8.07                 | C-8             | 138.4                  | 144.7                 |
| <i>meta</i> PhCO    | 7.52                  | 7.57-7.54            | COPh            | 162.7                  | 168.3                 |
| <i>meta</i> PhCO    | 7.54                  | 7.57-7.54            | Cq, Ph          | 133.6                  | 134.0                 |
| <i>para</i> PhCO    | 7.63                  | 7.65                 | Ph              | 124.8                  | 120.2                 |
| H-1'                | 6.22                  | 6.30                 | Ph              | 128.2                  | 129.8                 |
| H-2'                | 5.27                  | 6.26                 | Ph              | 126.9                  | 123.3                 |
| H-3'                | 5.38                  | 5.65                 | Ph              | 127.5                  | 129.5                 |
| H-4'                | 4.62                  | 5.01                 | Ph              | 131.9                  | 134.0                 |
| H-5'                | 4.13                  | 4.28                 | C-3'            | 66.7                   | 70.3                  |
| CH <sub>3</sub> -6' | 1.36                  | 1.41-2.14            | C-2'            | 67.8                   | 68.9                  |
| CH <sub>3</sub> -6' | 1.34                  | 1.41-2.14            | C-1'            | 70.4                   | 80.3                  |
| CH <sub>3</sub> -6' | 2.37                  | 1.41-2.14            | C-5'            | 74.4                   | 73.1                  |
| CH <sub>3</sub>     | 1.59                  | 1.41-2.14            | C-4'            | 71.2                   | 73.2                  |
| CH <sub>3</sub>     | 1.52                  | 1.41-2.14            | C-6'            | 15.3                   | 17.2                  |
| CH <sub>3</sub>     | 1.88                  | 1.41-2.14            | CO              | 169.0                  | 171.2                 |
| CH <sub>3</sub>     | 1.91                  | 1.41-2.14            | CH <sub>3</sub> | 20.2                   | 20.4                  |
| CH <sub>3</sub>     | 2.36                  | 1.41-2.14            | CO              | 169.5                  | 171.2                 |
| CH <sub>3</sub>     | 2.43                  | 1.41-2.14            | CH <sub>3</sub> | 20.8                   | 20.6                  |

|                 |      |           |                 |       |       |
|-----------------|------|-----------|-----------------|-------|-------|
| CH <sub>3</sub> | 2.35 | 1.41-2.14 | CO              | 169.0 | 171.2 |
| CH <sub>3</sub> | 2.35 | 1.41-2.14 | CH <sub>3</sub> | 20.9  | 20.7  |
| CH <sub>3</sub> | 1.89 | 1.41-2.14 |                 |       |       |

**Table S6.** NMR chemical shifts calculated for compound **12**, “conformer b”.

| H (paper)           | <sup>1</sup> H δ calc | <sup>1</sup> H δ exp | C (paper)       | <sup>13</sup> C δ calc | <sup>13</sup> C δ exp |
|---------------------|-----------------------|----------------------|-----------------|------------------------|-----------------------|
| H-2                 | 8.44                  | 8.75                 | C-4             | 150.7                  | 153.5                 |
| H-8                 | 7.92                  | 8.59                 | C-5             | 121.8                  | 125.0                 |
| NH                  | 7.72                  | 7.57-7.54            | C-6             | 148.0                  | 151.3                 |
| <i>ortho</i> PhCO   | 7.88                  | 8.07                 | C-2             | 149.5                  | 153.5                 |
| <i>ortho</i> PhCO   | 8.03                  | 8.07                 | C-8             | 138.5                  | 144.7                 |
| <i>meta</i> PhCO    | 7.51                  | 7.57-7.54            | COPh            | 164.0                  | 168.3                 |
| <i>meta</i> PhCO    | 7.53                  | 7.57-7.54            | Cq, Ph          | 132.4                  | 134.0                 |
| <i>para</i> PhCO    | 7.64                  | 7.65                 | Ph              | 126.1                  | 120.2                 |
| H-1'                | 6.29                  | 6.30                 | Ph              | 128.1                  | 129.8                 |
| H-2'                | 5.32                  | 6.26                 | Ph              | 126.9                  | 123.3                 |
| H-3'                | 5.39                  | 5.65                 | Ph              | 127.2                  | 129.5                 |
| H-4'                | 4.63                  | 5.01                 | Ph              | 132.2                  | 134.0                 |
| H-5'                | 4.12                  | 4.28                 | C-3'            | 66.8                   | 70.3                  |
| CH <sub>3</sub> -6' | 1.36                  | 1.41-2.14            | C-2'            | 67.4                   | 68.9                  |
| CH <sub>3</sub> -6' | 1.36                  | 1.41-2.14            | C-1'            | 70.2                   | 80.3                  |
| CH <sub>3</sub> -6' | 2.38                  | 1.41-2.14            | C-5'            | 74.4                   | 73.1                  |
| CH <sub>3</sub>     | 1.59                  | 1.41-2.14            | C-4'            | 71.2                   | 73.2                  |
| CH <sub>3</sub>     | 1.54                  | 1.41-2.14            | C-6'            | 15.4                   | 17.2                  |
| CH <sub>3</sub>     | 1.89                  | 1.41-2.14            | CO              | 169.0                  | 171.2                 |
| CH <sub>3</sub>     | 1.91                  | 1.41-2.14            | CH <sub>3</sub> | 20.3                   | 20.4                  |
| CH <sub>3</sub>     | 2.36                  | 1.41-2.14            | CO              | 169.5                  | 171.2                 |
| CH <sub>3</sub>     | 2.43                  | 1.41-2.14            | CH <sub>3</sub> | 20.8                   | 20.6                  |
| CH <sub>3</sub>     | 2.35                  | 1.41-2.14            | CO              | 169.0                  | 171.2                 |
| CH <sub>3</sub>     | 2.35                  | 1.41-2.14            | CH <sub>3</sub> | 20.9                   | 20.7                  |
| CH <sub>3</sub>     | 1.88                  | 1.41-2.14            |                 |                        |                       |

**Table S7.** NMR chemical shifts calculated for compound **15**.

| H (paper)             | <sup>1</sup> H δ calc | <sup>1</sup> H δ exp             | C (paper)          | <sup>13</sup> C δ calc | <sup>13</sup> C δ exp |
|-----------------------|-----------------------|----------------------------------|--------------------|------------------------|-----------------------|
| H-2                   | 8.36                  | 8.59                             | C-4                | 148.8                  | 153.0                 |
| H-8                   | 7.87                  | 8.41                             | C-5                | 119.1                  | 125.1                 |
| NH                    | 8.77                  | 7.41-7.24                        | C-6                | 147.4                  | 151.0                 |
| ortho PhCO            | 7.91                  | 8.09                             | C-2                | 149.7                  | 153.0                 |
| ortho PhCO            | 8.05                  | 8.09                             | C-8                | 139.1                  | 145.1                 |
| meta PhCO             | 7.54                  | 7.54                             | CONH               | 162.5                  | 168.1                 |
| meta PhCO             | 7.55                  | 7.54                             | Ph-Cq              | 133.6                  | 138.5                 |
| para PhCO             | 7.64                  | 7.63                             | Ph                 | 124.7                  | 138.5-128.7           |
| H-1'                  | 6.07                  | 6.17                             | Ph                 | 128.2                  | 138.5-128.7           |
| H-2'                  | 4.13                  | 4.82                             | Ph                 | 126.9                  | 138.5-128.7           |
| H-3'                  | 4.66                  | 4.10                             | Ph                 | 127.5                  | 138.5-128.7           |
| H-4'                  | 3.65                  | 3.64                             | Ph                 | 131.9                  | 138.5-128.7           |
| H-5'                  | 4.06                  | 4.37                             | C-3'               | 70.2                   | 76.0                  |
| CH <sub>3</sub>       | 1.03                  | 1.35                             | C-2'               | 77.8                   | 74.6                  |
| CH <sub>3</sub>       | 1.02                  | 1.35                             | C-1'               | 72.4                   | 81.3                  |
| CH <sub>3</sub>       | 1.98                  | 1.35                             | C-5'               | 77.0                   | 74.1                  |
| CH <sub>2</sub> Ph-2' | 4.18                  | 4.26, 4.23                       | C-4'               | 78.7                   | 81.1                  |
| CH <sub>2</sub> Ph-2' | 4.75                  | 4.45, 4.42                       | C-6'               | 16.6                   | 18.3                  |
| Ph-2'                 | 7.30                  | 7.27-7.24,<br>7.15-7.04,<br>6.93 | CH <sub>2</sub> Ph | 70.9                   | 72.4                  |
| Ph-2'                 | 6.46                  | 7.27-7.24,<br>7.15-7.04,<br>6.93 | Ph-Cq              | 137.0                  | 139.4                 |
| Ph-2'                 | 7.24                  | 7.27-7.24,<br>7.15-7.04,<br>6.93 | Ph                 | 127.8                  | 138.5-128.7           |
| Ph-2'                 | 7.02                  | 7.27-7.24,<br>7.15-7.04,<br>6.93 | Ph                 | 128.6                  | 138.5-128.7           |
| Ph-2'                 | 7.20                  | 7.27-7.24,<br>7.15-7.04,<br>6.93 | Ph                 | 126.4                  | 138.5-128.7           |

|                       |      |                                  |                    |       |             |
|-----------------------|------|----------------------------------|--------------------|-------|-------------|
| CH <sub>2</sub> Ph-3' | 4.83 | 4.75, 4.72                       | Ph                 | 126.7 | 138.5-128.7 |
| CH <sub>2</sub> Ph-3' | 4.54 | 4.70, 4.67                       | Ph                 | 126.7 | 138.5-128.7 |
| Ph-3'                 | 7.16 | 7.27-7.24,<br>7.15-7.04,<br>6.93 | CH <sub>2</sub> Ph | 74.3  | 73.8        |
| Ph-3'                 | 7.53 | 7.27-7.24,<br>7.15-7.04,<br>6.93 | Ph-Cq              | 137.6 | 153.4       |
| Ph-3'                 | 7.30 | 7.27-7.24,<br>7.15-7.04,<br>6.93 | Ph                 | 129.0 | 138.5-128.7 |
| Ph-3'                 | 7.43 | 7.27-7.24,<br>7.15-7.04,<br>6.93 | Ph                 | 129.4 | 138.5-128.7 |
| Ph-3'                 | 7.36 | 7.27-7.24,<br>7.15-7.04,<br>6.93 | Ph                 | 126.7 | 138.5-128.7 |
| CH <sub>2</sub> Ph-4' | 4.42 | 4.56, 4.53                       | Ph                 | 126.9 | 138.5-128.7 |
| CH <sub>2</sub> Ph-4' | 4.73 | 4.69, 4.57                       | Ph                 | 126.9 | 138.5-128.7 |
| Ph-4'                 | 7.53 | 7.27-7.24,<br>7.15-7.04,<br>6.93 | CH <sub>2</sub> Ph | 71.7  | 73.3        |
| Ph-4'                 | 7.53 | 7.27-7.24,<br>7.15-7.04,<br>6.93 | Ph-Cq              | 137.4 | 139.5       |
| Ph-4'                 | 7.45 | 7.27-7.24,<br>7.15-7.04,<br>6.93 | Ph                 | 129.6 | 138.5-128.7 |
| Ph-4'                 | 7.44 | 7.27-7.24,<br>7.15-7.04,<br>6.93 | Ph                 | 128.9 | 138.5-128.7 |
| Ph-4'                 | 7.41 | 7.27-7.24,<br>7.15-7.04,<br>6.93 | Ph                 | 127.0 | 138.5-128.7 |
|                       |      |                                  | Ph                 | 126.8 | 138.5-128.7 |
|                       |      |                                  | Ph                 | 126.9 | 138.5-128.7 |

### Molecular Electrostatic Potential Maps

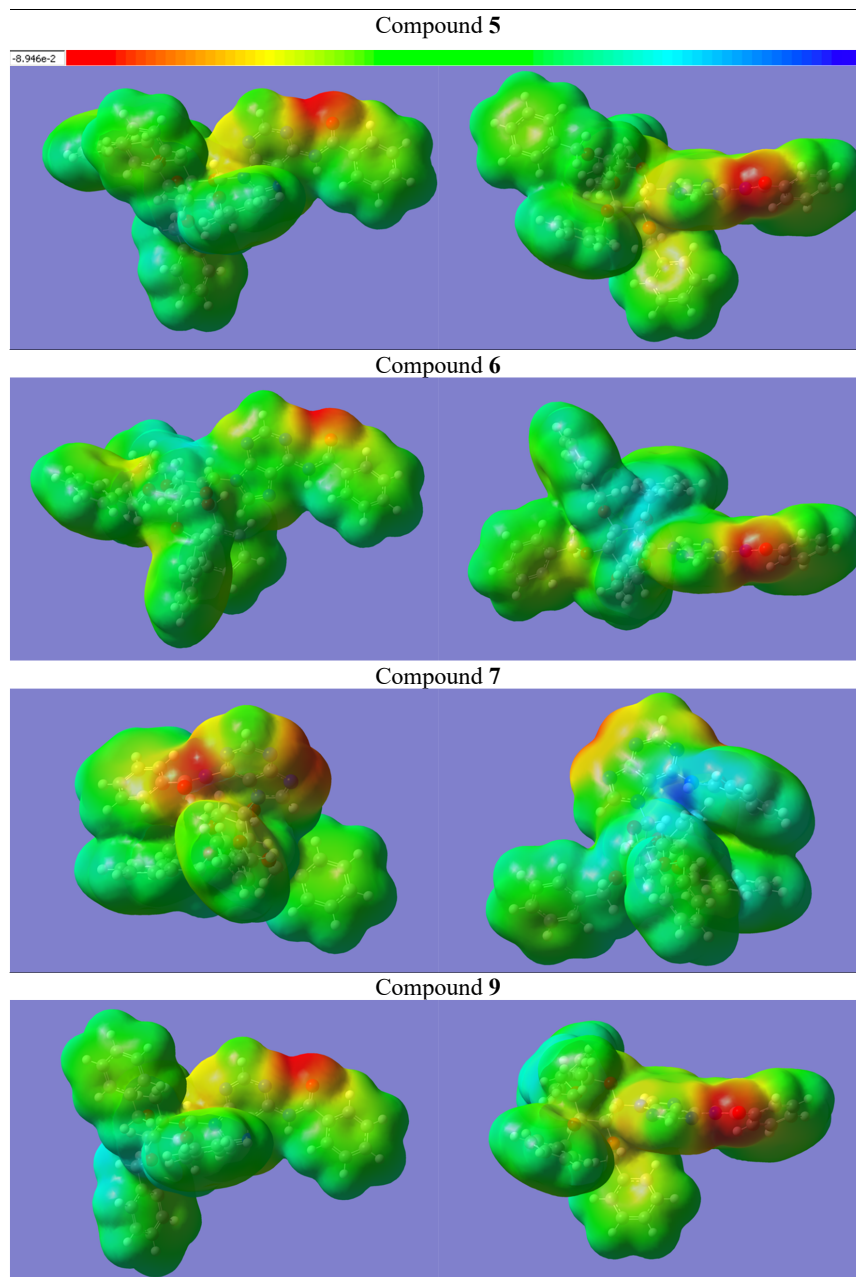

Figure S48. Different views of the electrostatic potential maps for compounds 5, 6, 7 and 9.



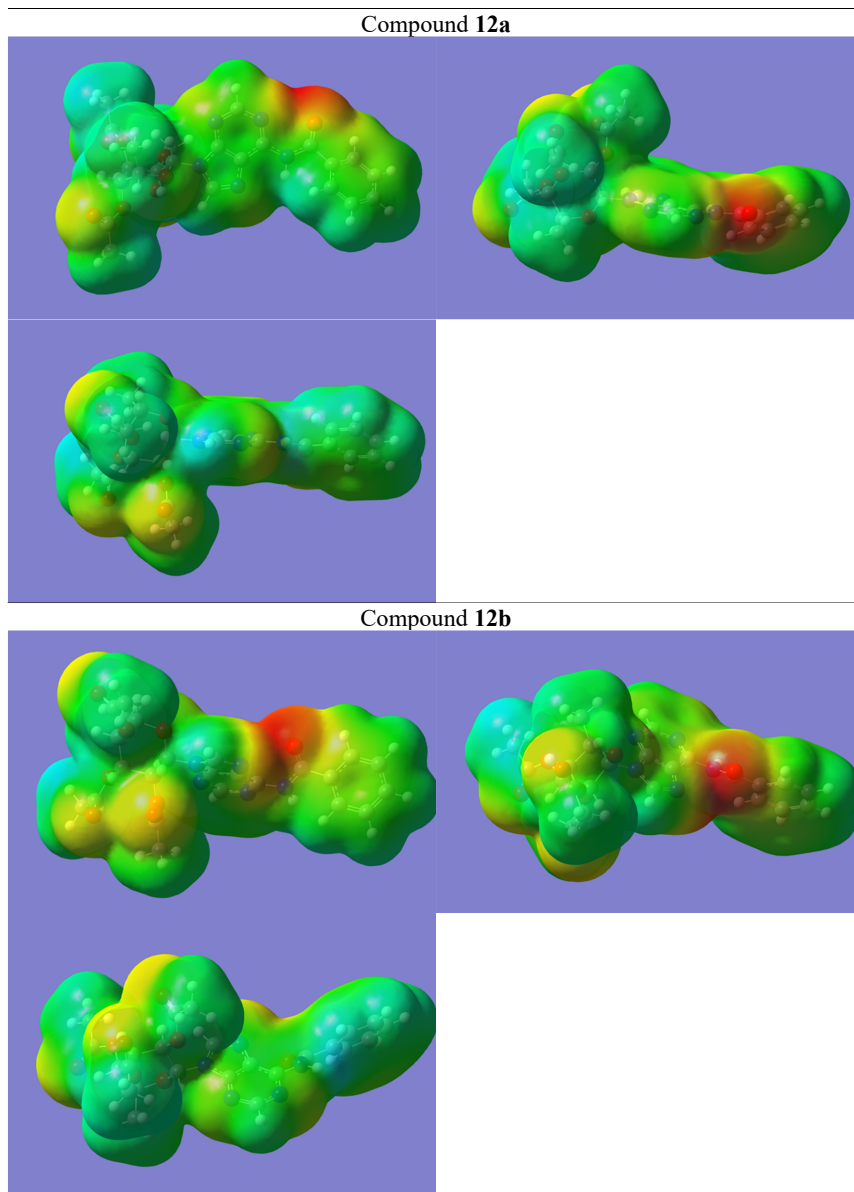

Figure S49. Different views of the electrostatic potential maps for conformers **12a** and **12b**.

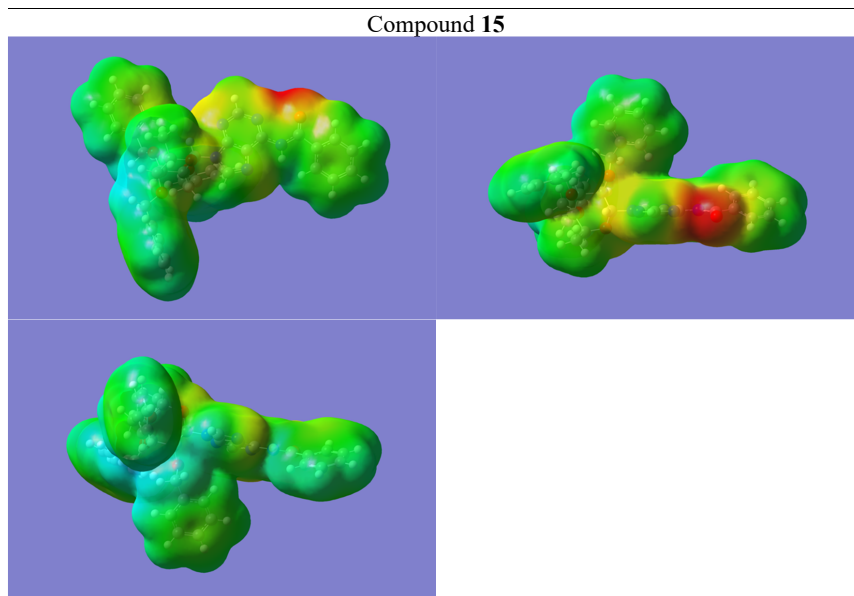

Figure S50. Different views of the electrostatic potential maps for compound **15**.

**Energy differences between the most stable conformers found for compound 12 ( $\alpha$  and  $\beta$  anomers)**

**Table S8.** Energy differences between conformers “a” and “b” for compound 12 ( $\alpha$  and  $\beta$ ) and between compound 12a ( $\alpha$  anomer) and 12b ( $\beta$  anomer).

| <i>Compound 12: <math>\alpha</math> anomer</i>                        |                            |                                                   |                      |
|-----------------------------------------------------------------------|----------------------------|---------------------------------------------------|----------------------|
| conformer                                                             | E / kcal.mol <sup>-1</sup> | $\Delta E(a-b)$ / kcal.mol <sup>-1</sup>          | Boltzmann population |
| a                                                                     | -1132494.89                | -0.55                                             | 0.72                 |
| b                                                                     | -1132494.34                |                                                   | 0.28                 |
| <i>Compound 12: <math>\beta</math> anomer</i>                         |                            |                                                   |                      |
| conformer                                                             | E / kcal.mol <sup>-1</sup> | $\Delta E(a-b)$ / kcal.mol <sup>-1</sup>          | Boltzmann population |
| a                                                                     | -1132488.59                | -1.51                                             | 0.93                 |
| b                                                                     | -1132487.08                |                                                   | 0.07                 |
| <i>Compound 12: <math>\alpha</math> and <math>\beta</math> anomer</i> |                            |                                                   |                      |
| Anomer                                                                | E / kcal.mol <sup>-1</sup> | $\Delta E(\alpha-\beta)$ / kcal.mol <sup>-1</sup> | Boltzmann population |
| $\alpha$                                                              | -1132494.89                | -6.30                                             | 1.00                 |
| $\beta$                                                               | -1132488.59                |                                                   | 0.00                 |
